# Supplementary material for: Differential expression of checkpoint markers in the normoxic and hypoxic microenvironment of glioblastomas
Source: PubMed Central journal article supplement — Brain Pathol. 2022 Sep 12;33(1):e13111. doi: 10.1111/bpa.13111 (PMC9836374; doi:10.1111/bpa.13111), 2022-09-12
Supplement: BPA-33-e13111-s002.pdf [file BPA-33-e13111-s002.pdf]

# Tumor 1

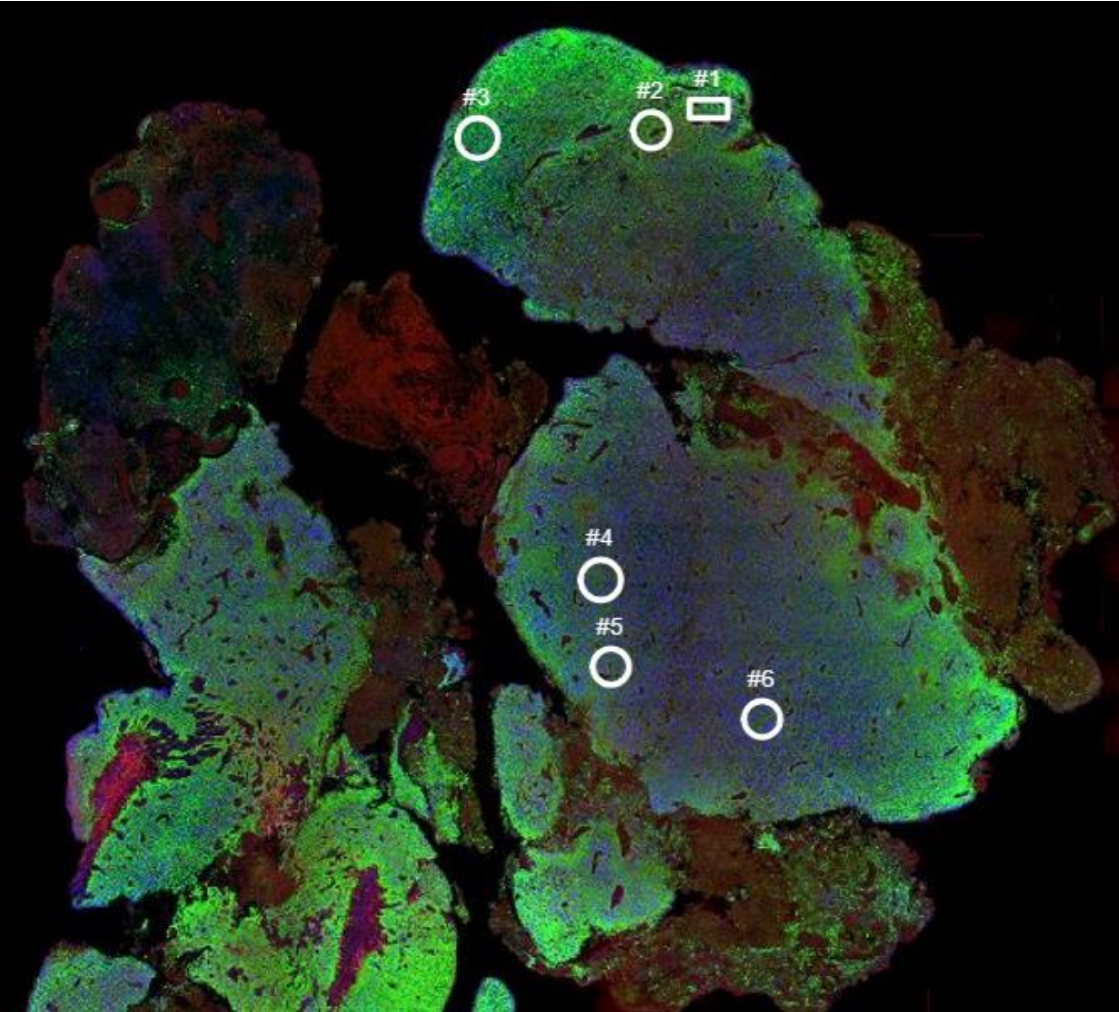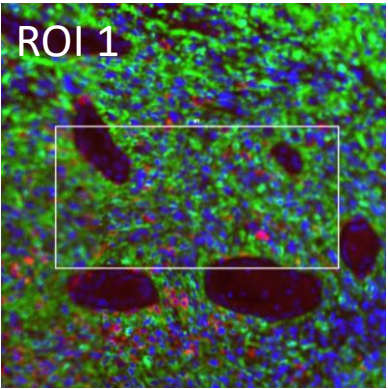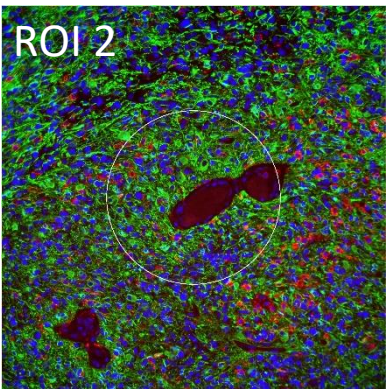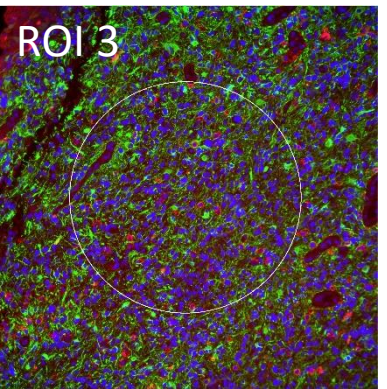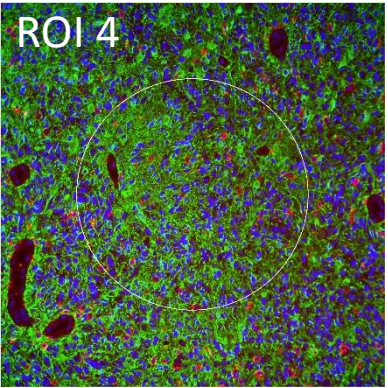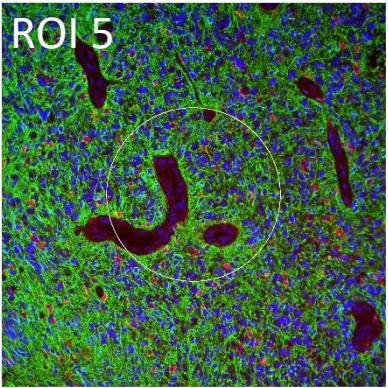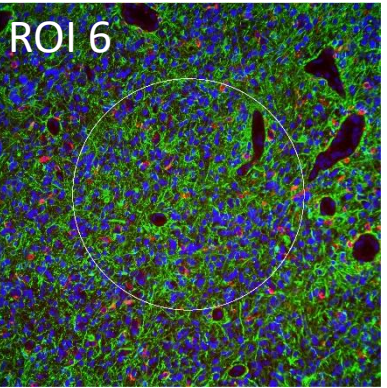

**Visualization markers:** Red: Iba1, Green: GFAP, Blue: DAPI.

# Tumor 1

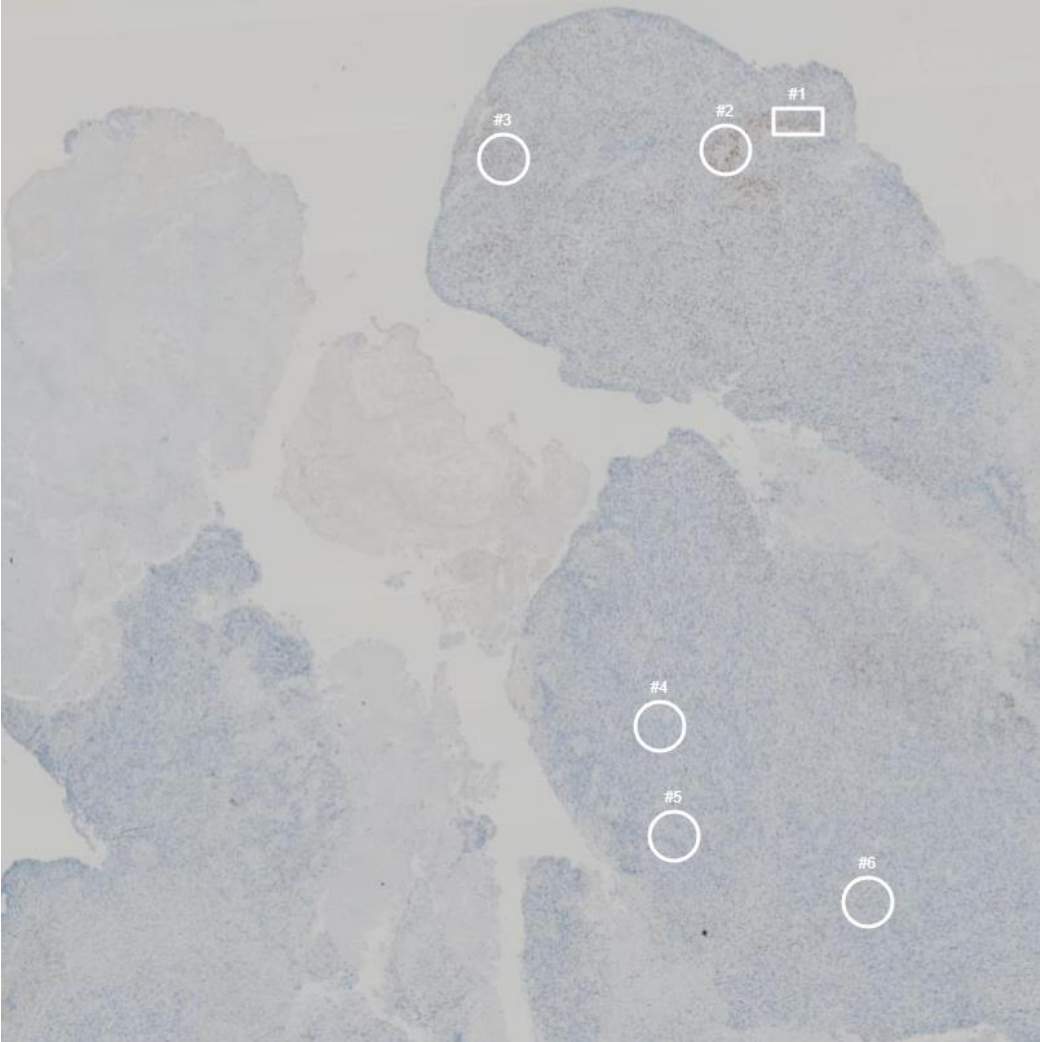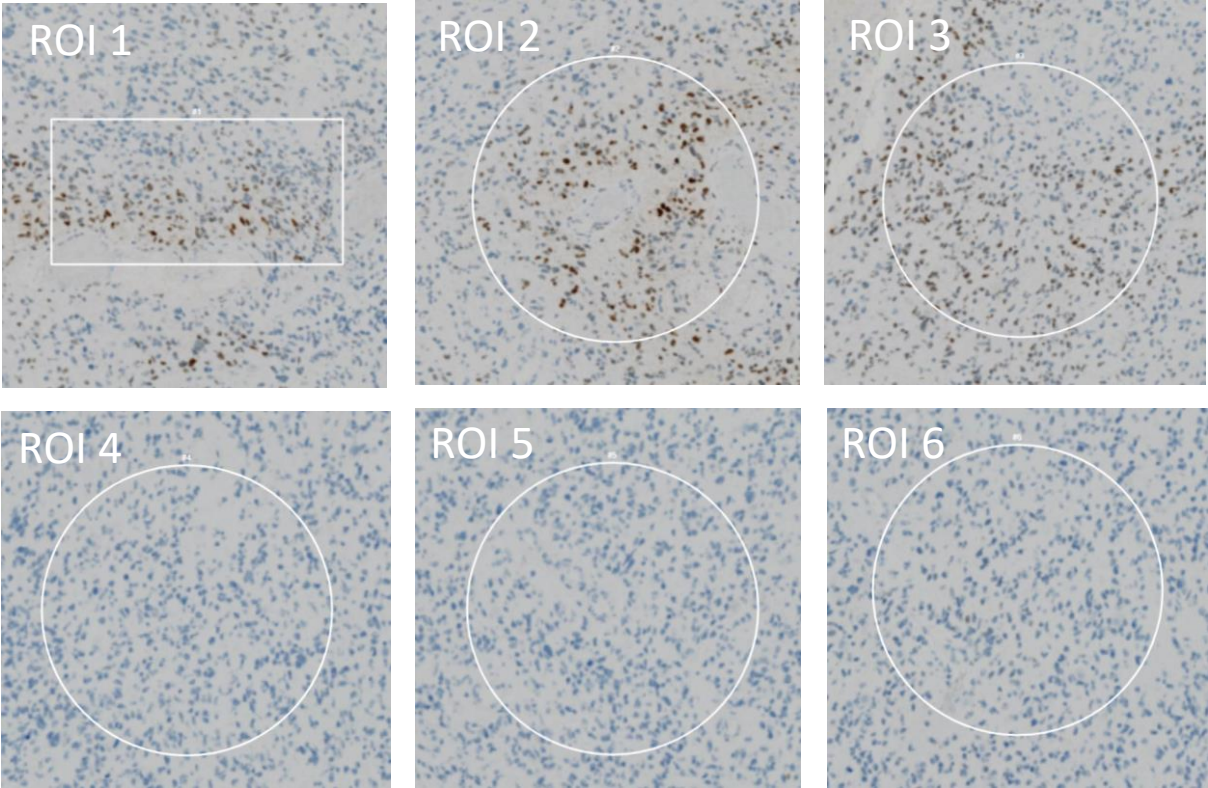

**Merged HIF-1 $\alpha$  immunohistochemical staining.**

# Tumor 1

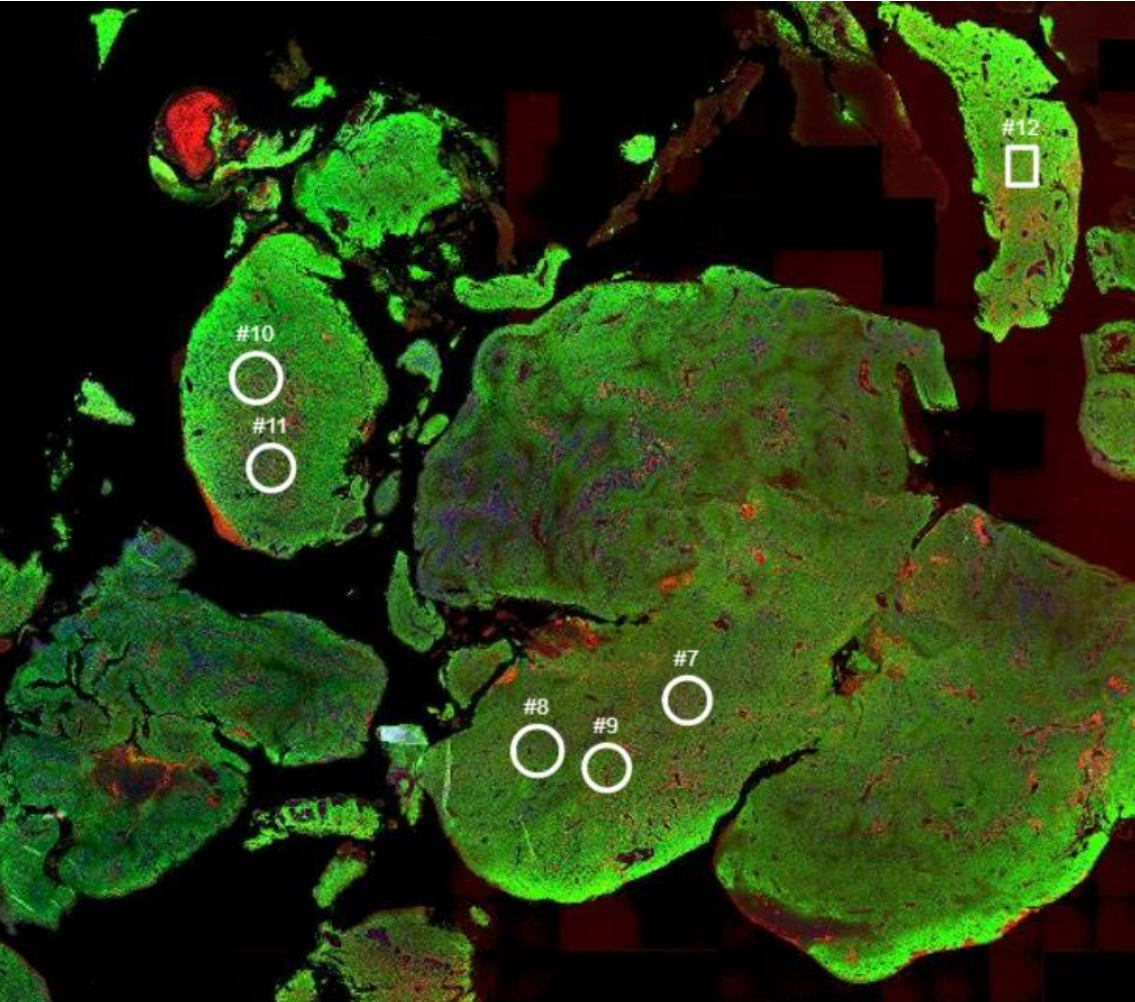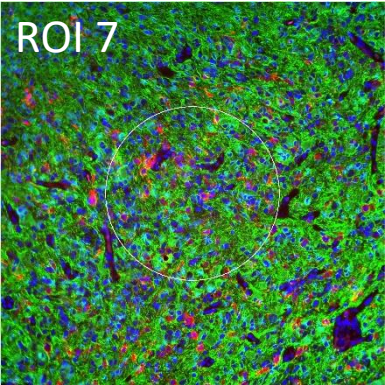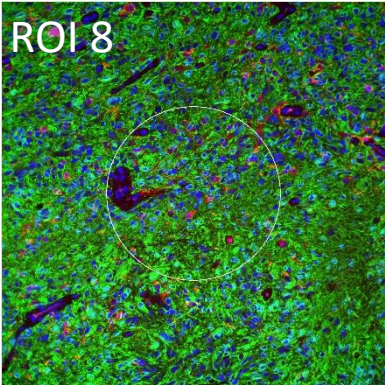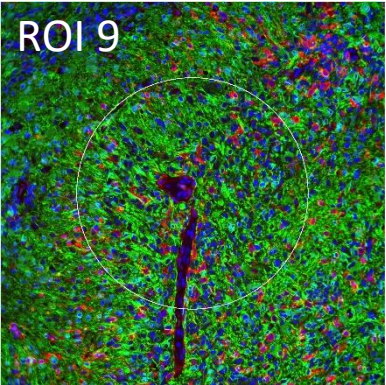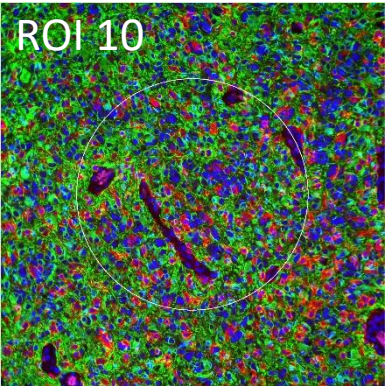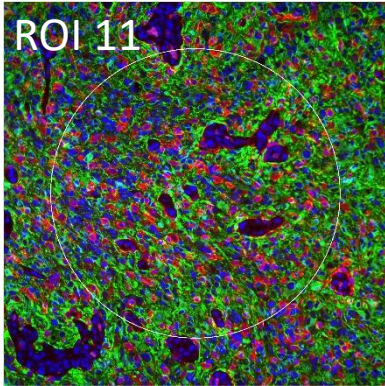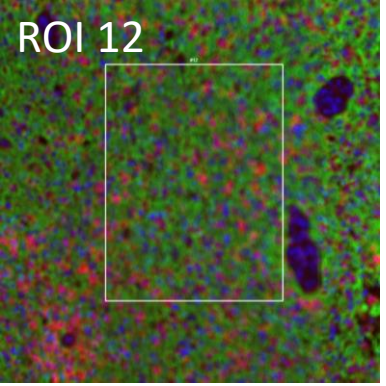

Visualization markers: Red: Iba1, Green: GFAP, Blue: DAPI.

# Tumor 1

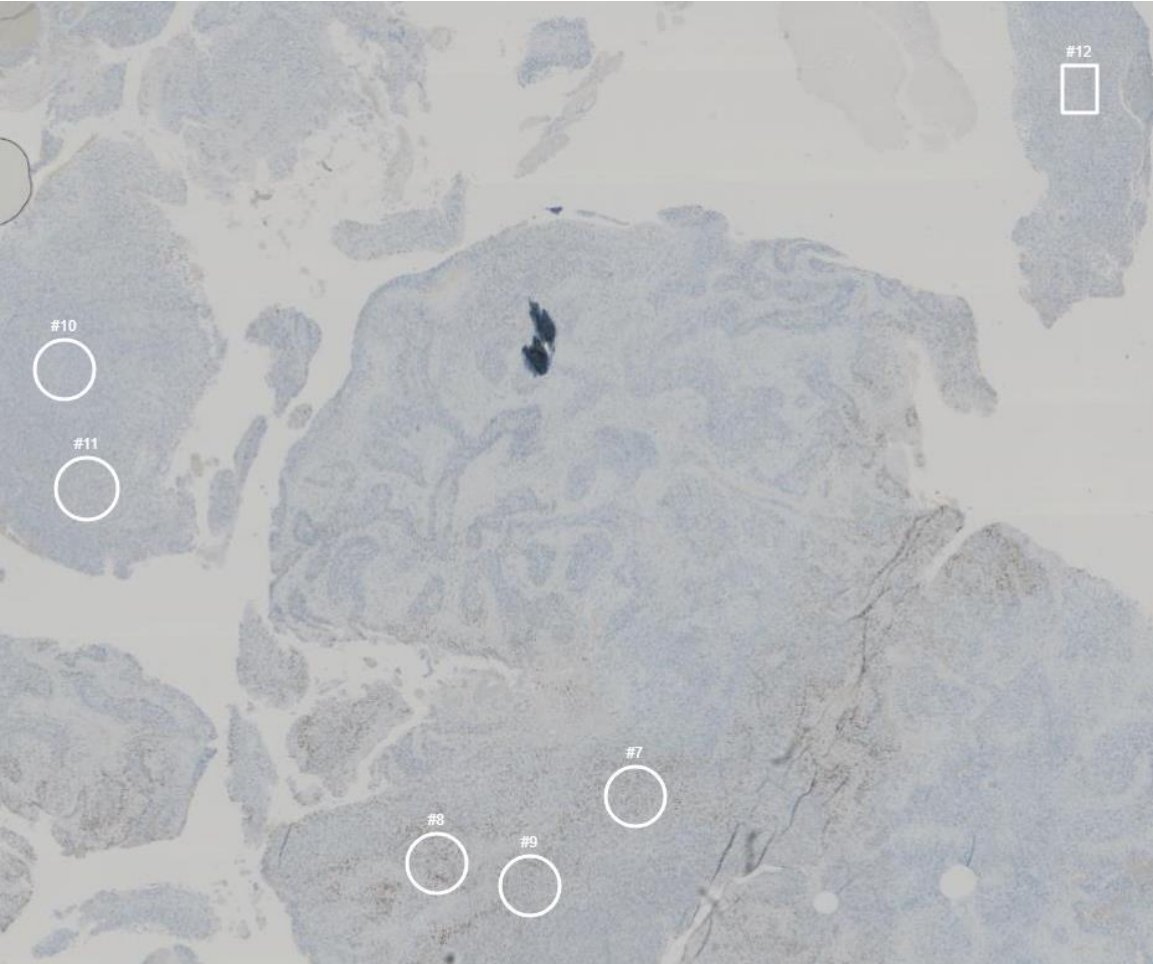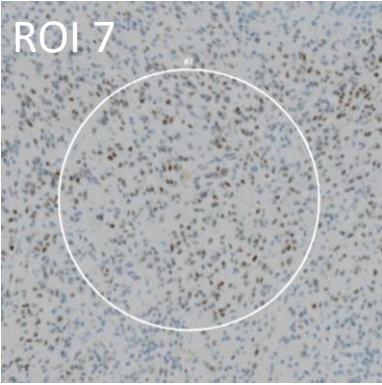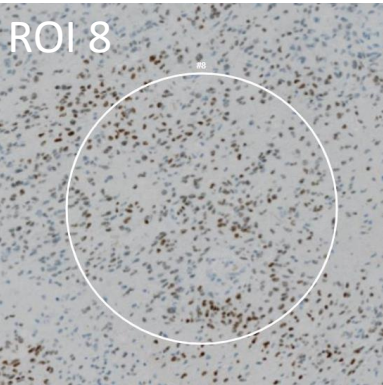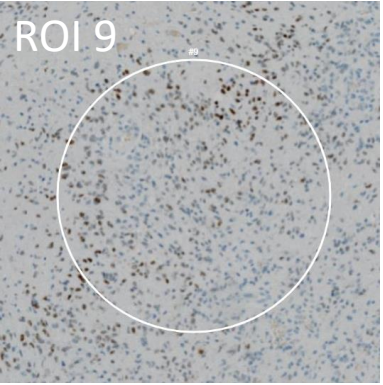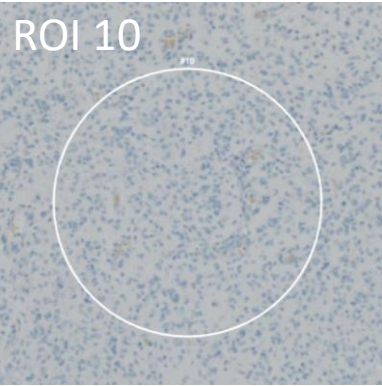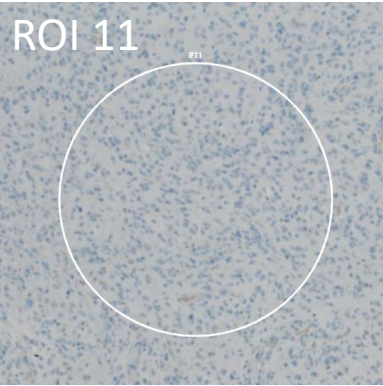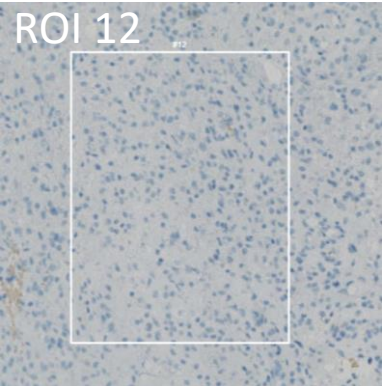

**Merged HIF-1α immunohistochemical staining.**

# Tumor 2

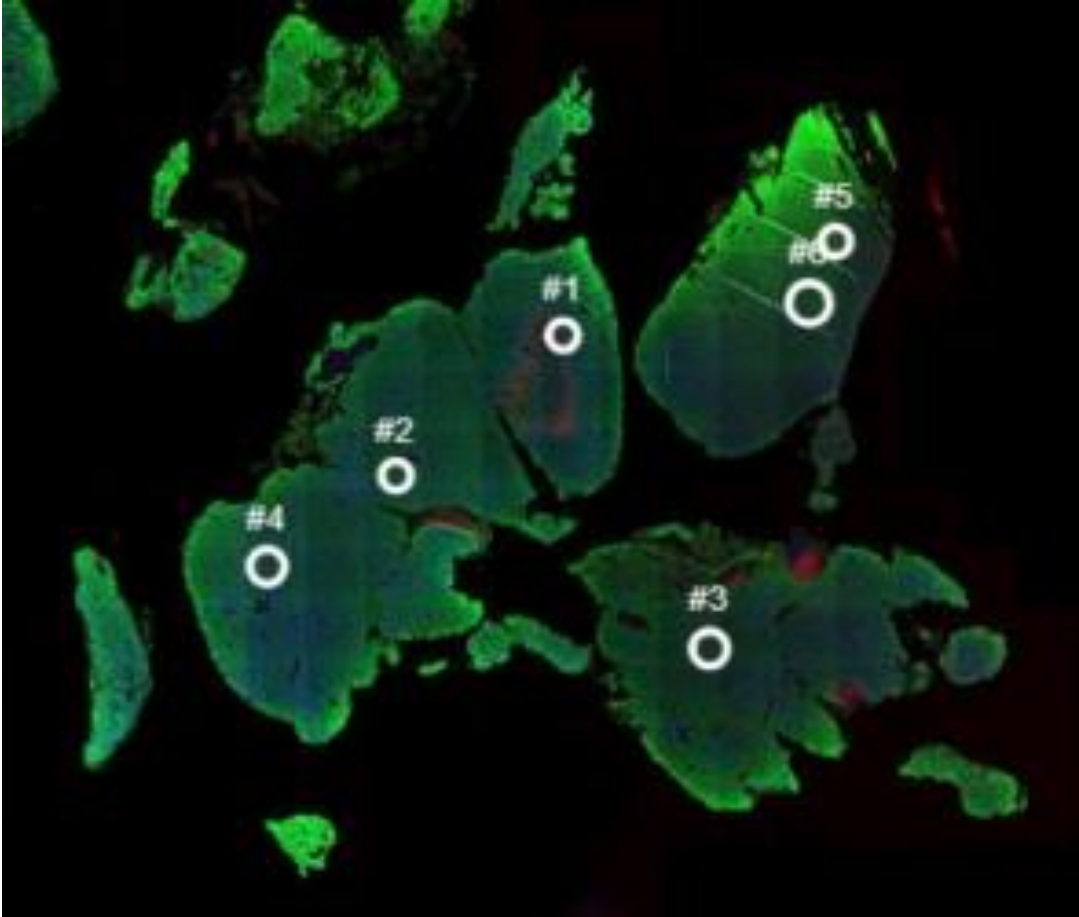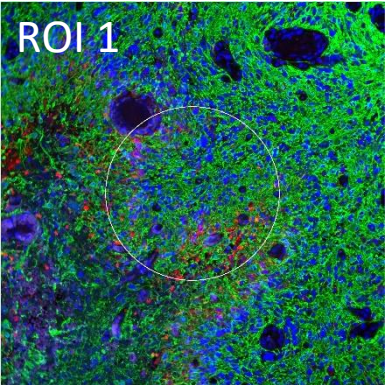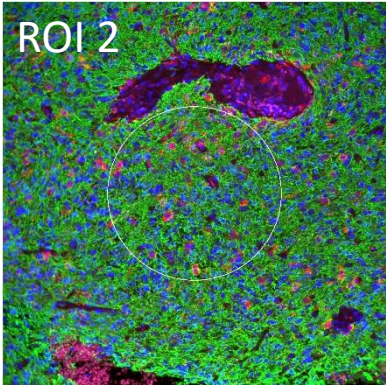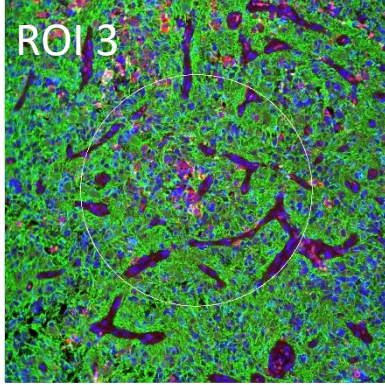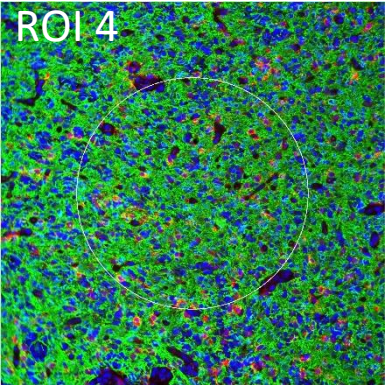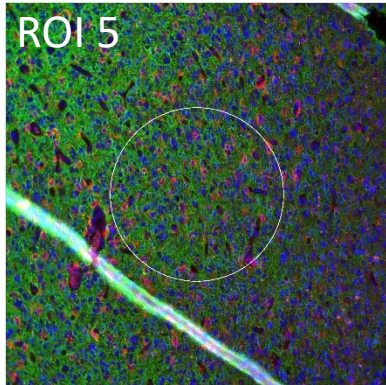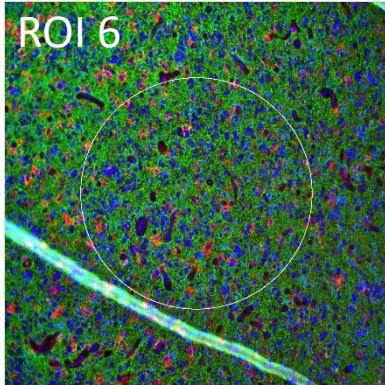

**Visualization markers:** Red: Iba1, Green: GFAP, Blue: DAPI.

# Tumor 2

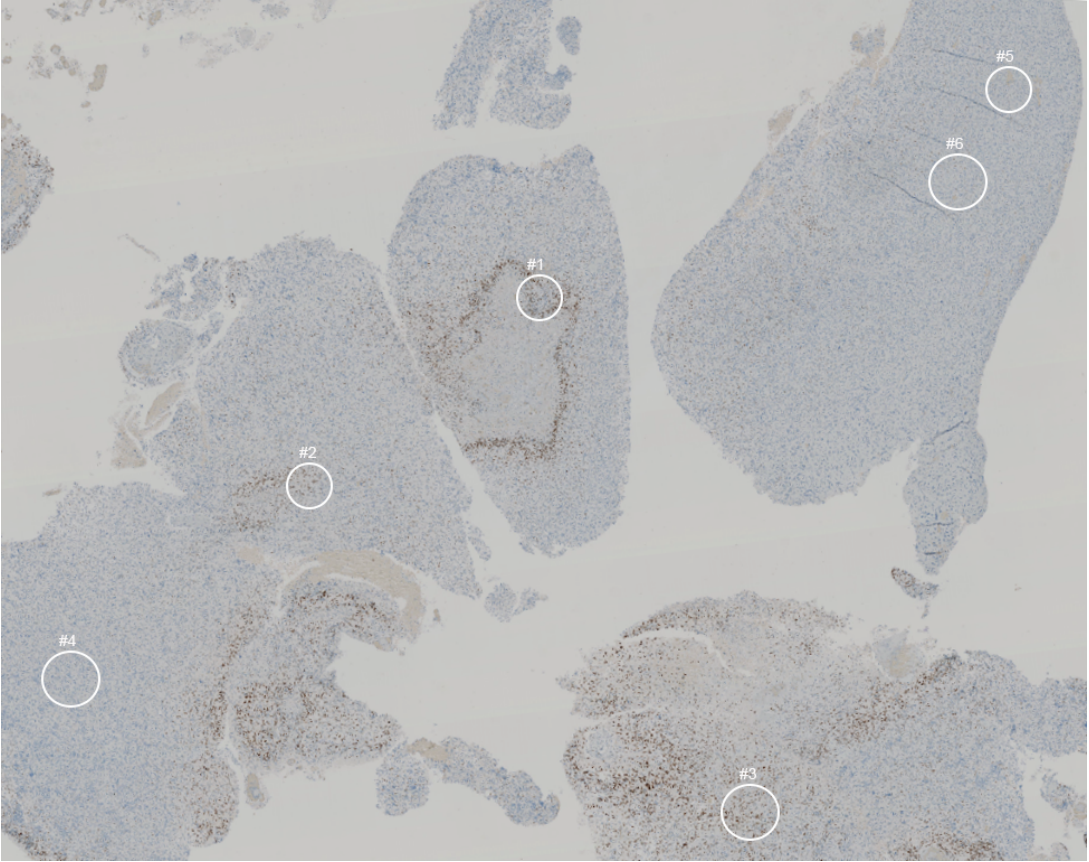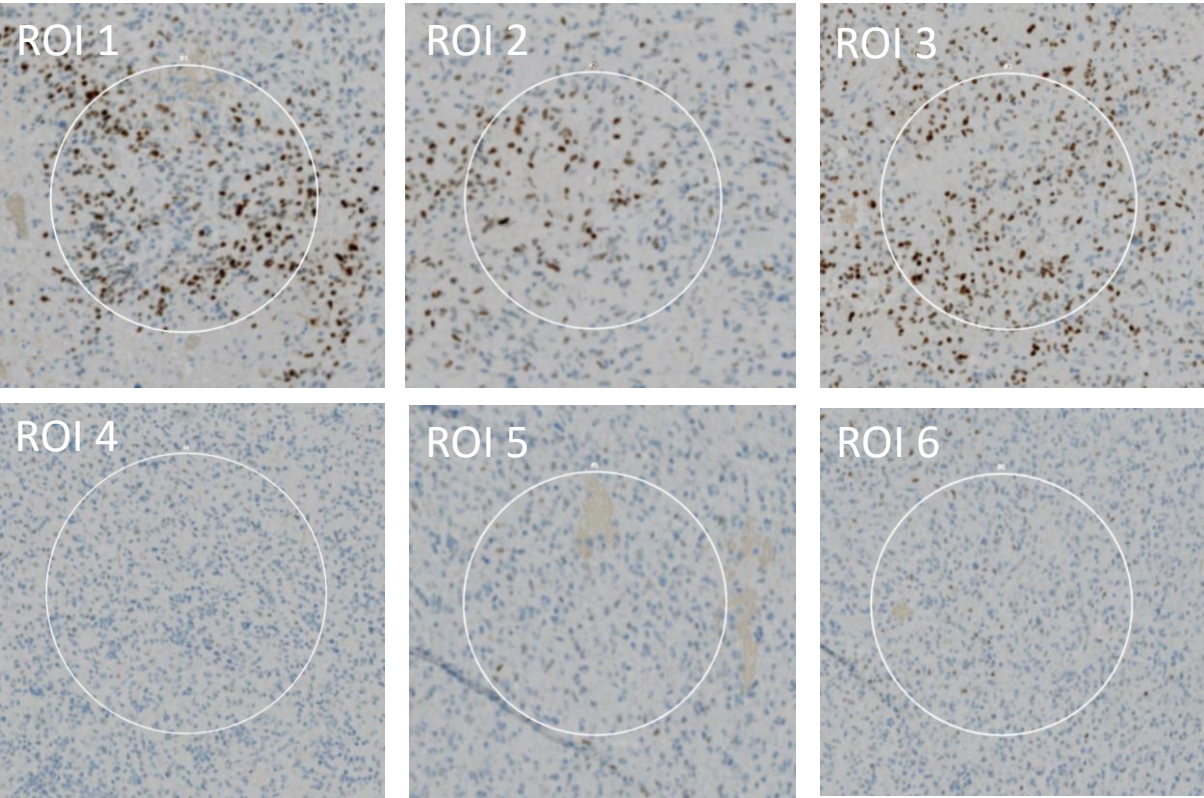

**Merged HIF-1α immunohistochemical staining.**

# Tumor 2

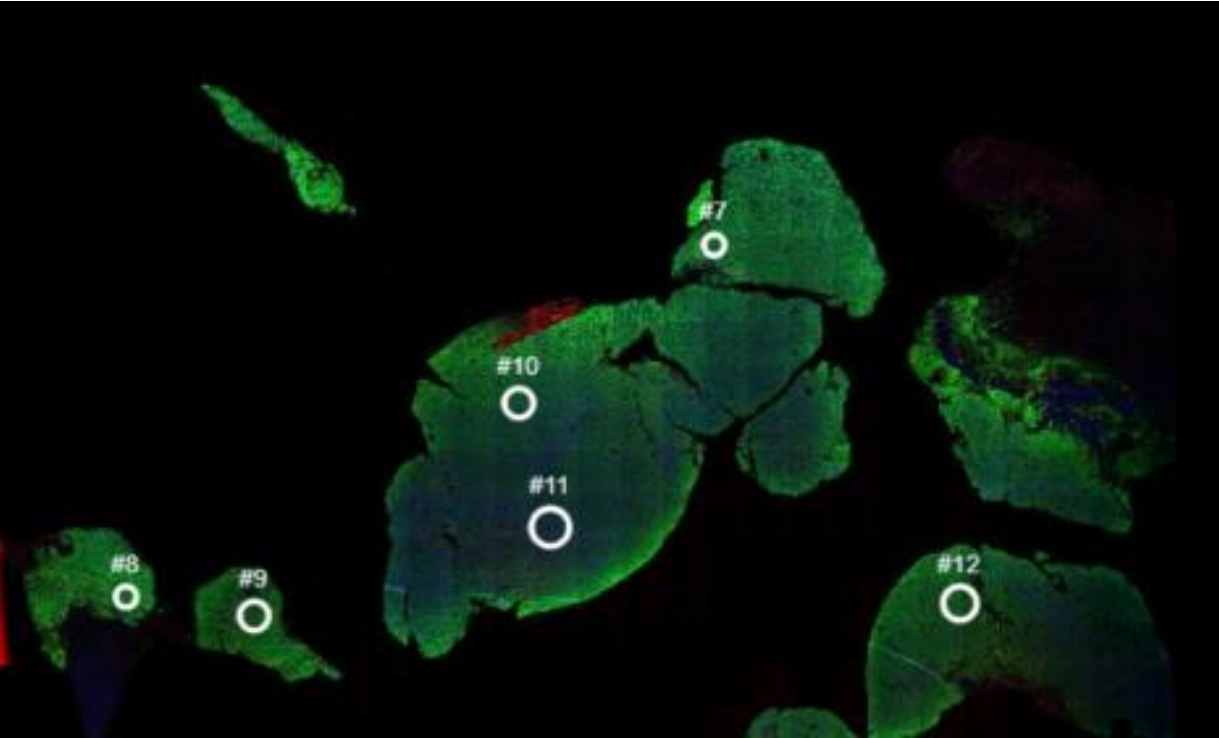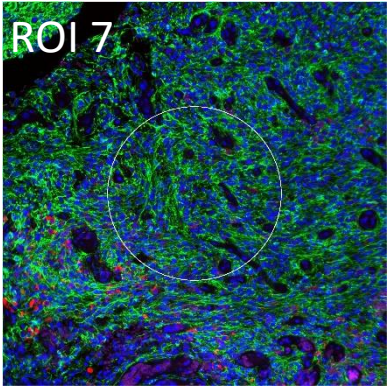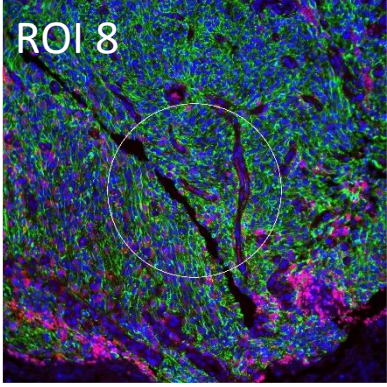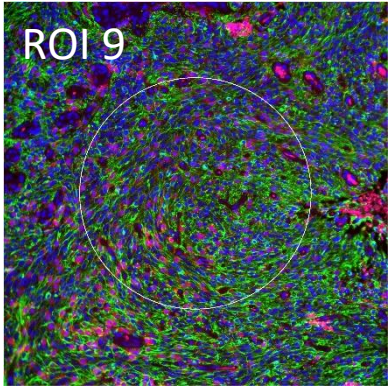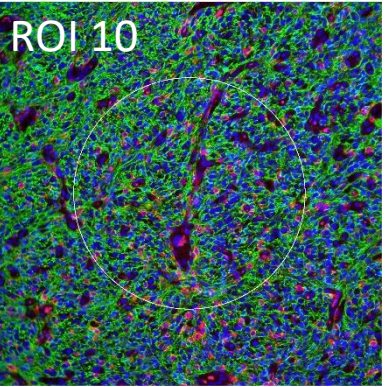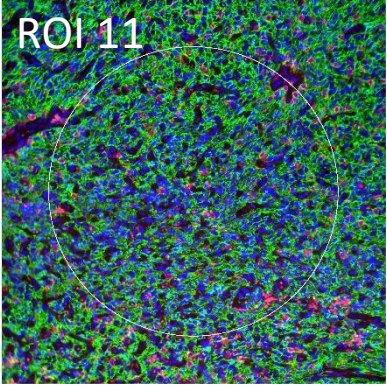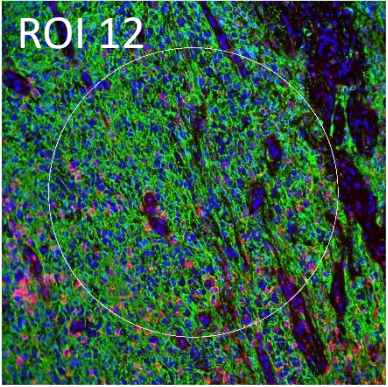

Visualization markers: Red: Iba1, Green: GFAP, Blue: DAPI.

# Tumor 2

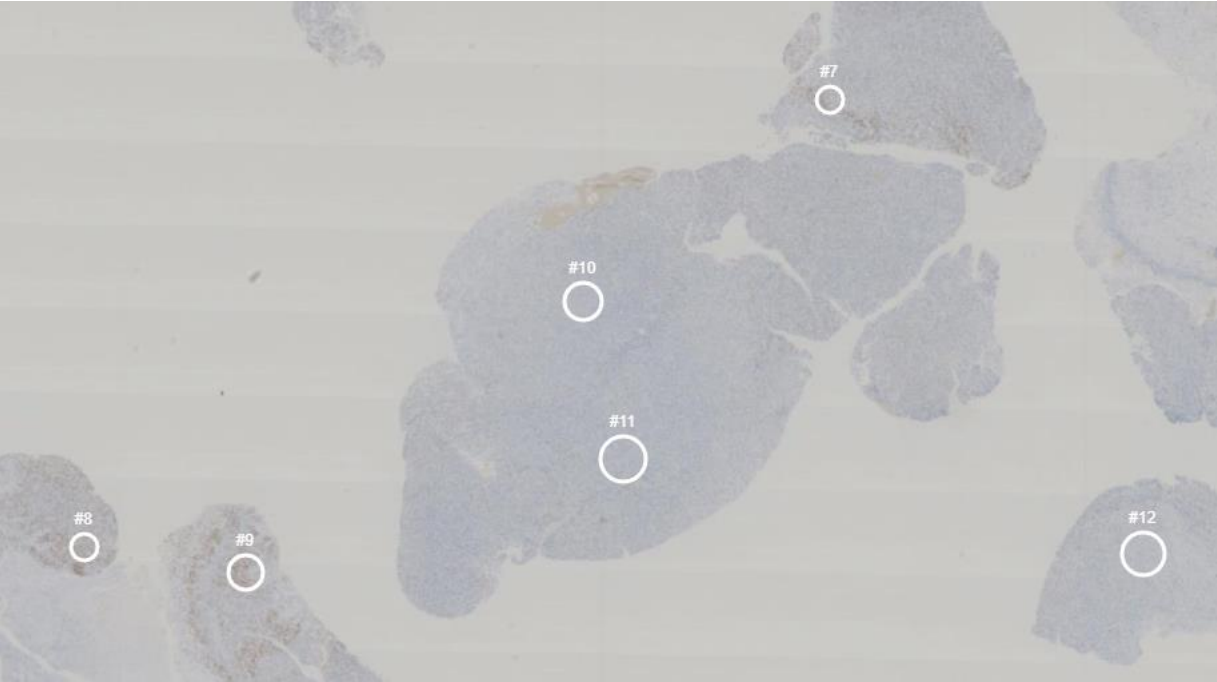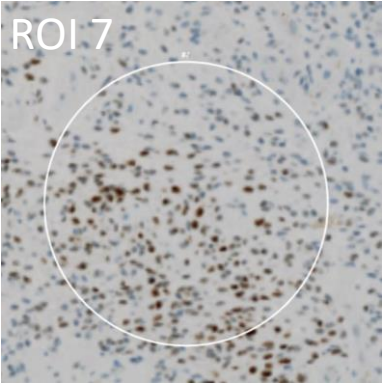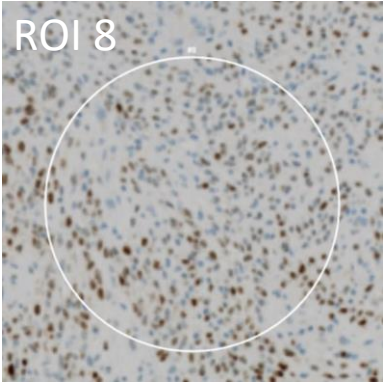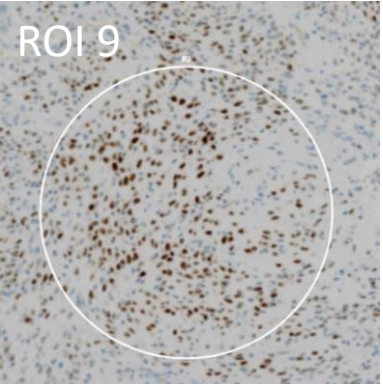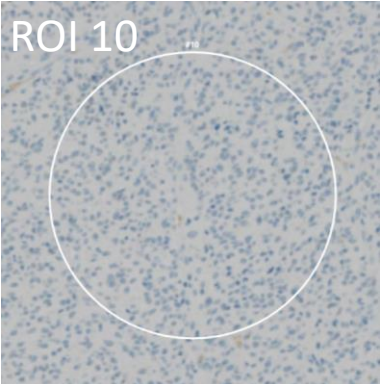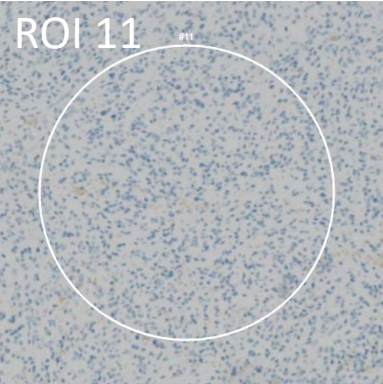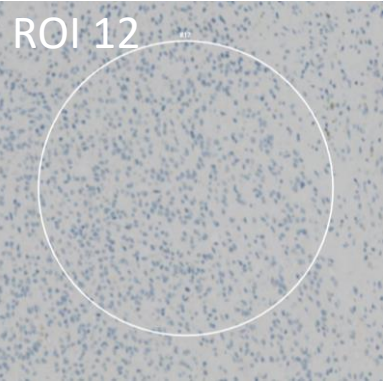

Merged HIF-1α immunohistochemical staining..



# Tumor 3

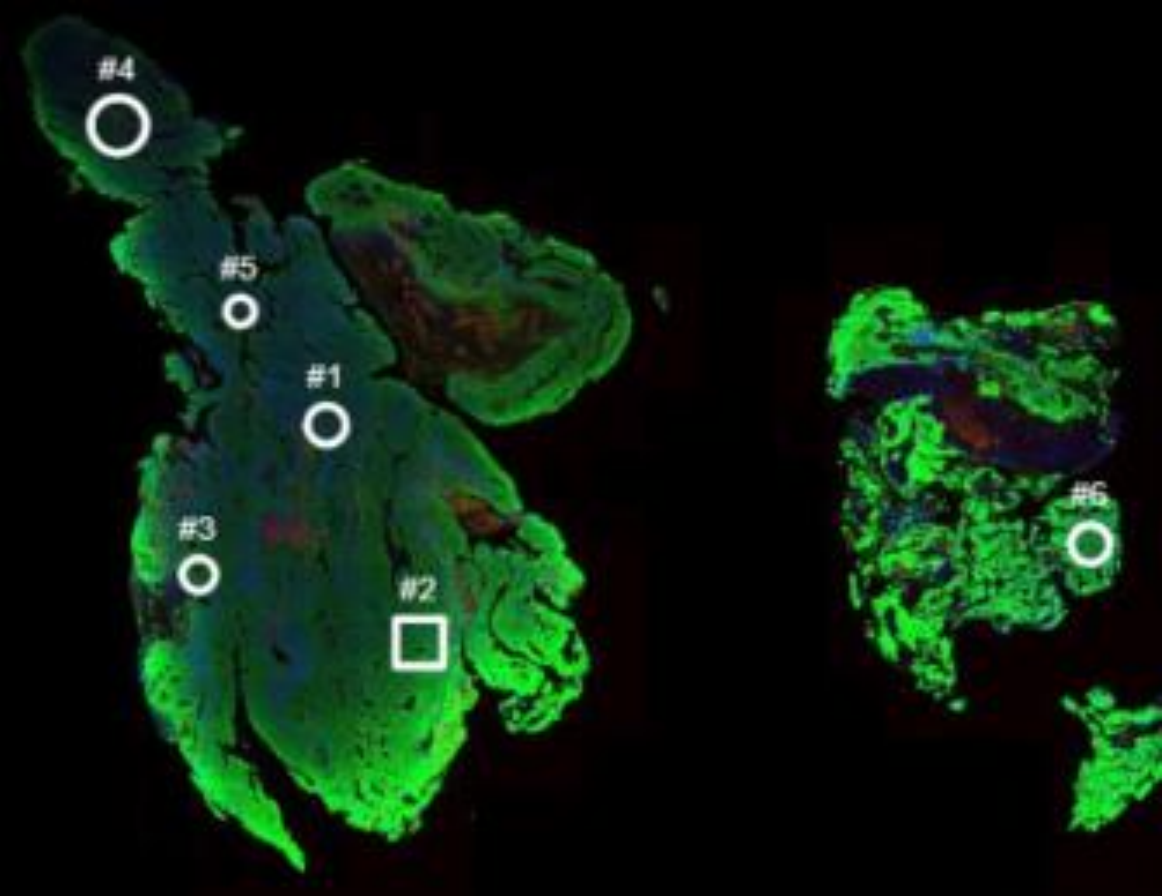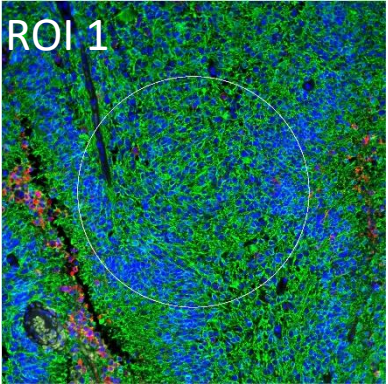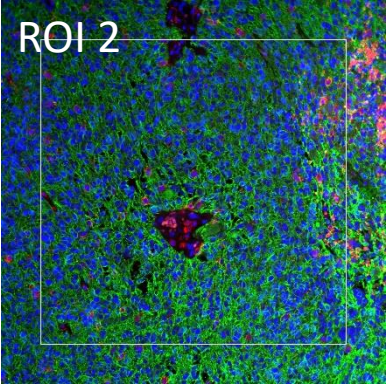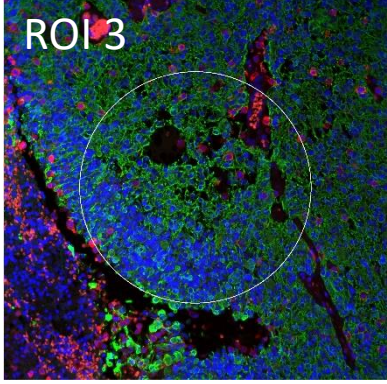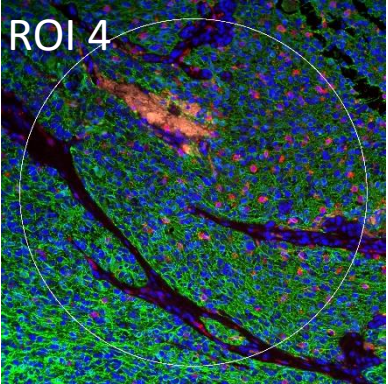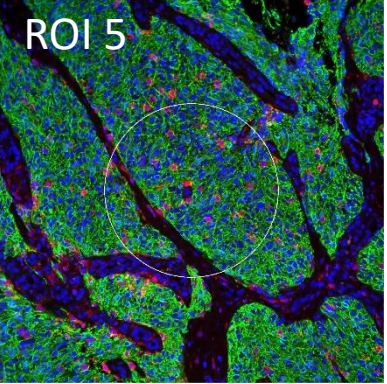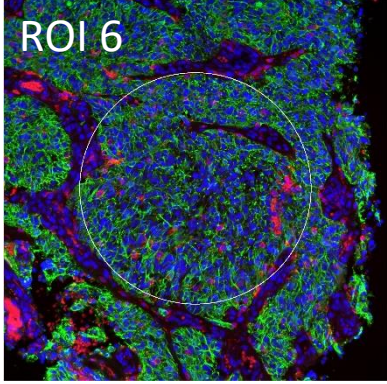

Visualization markers: Red: Iba1, Green: GFAP, Blue: DAPI.

# Tumor 3

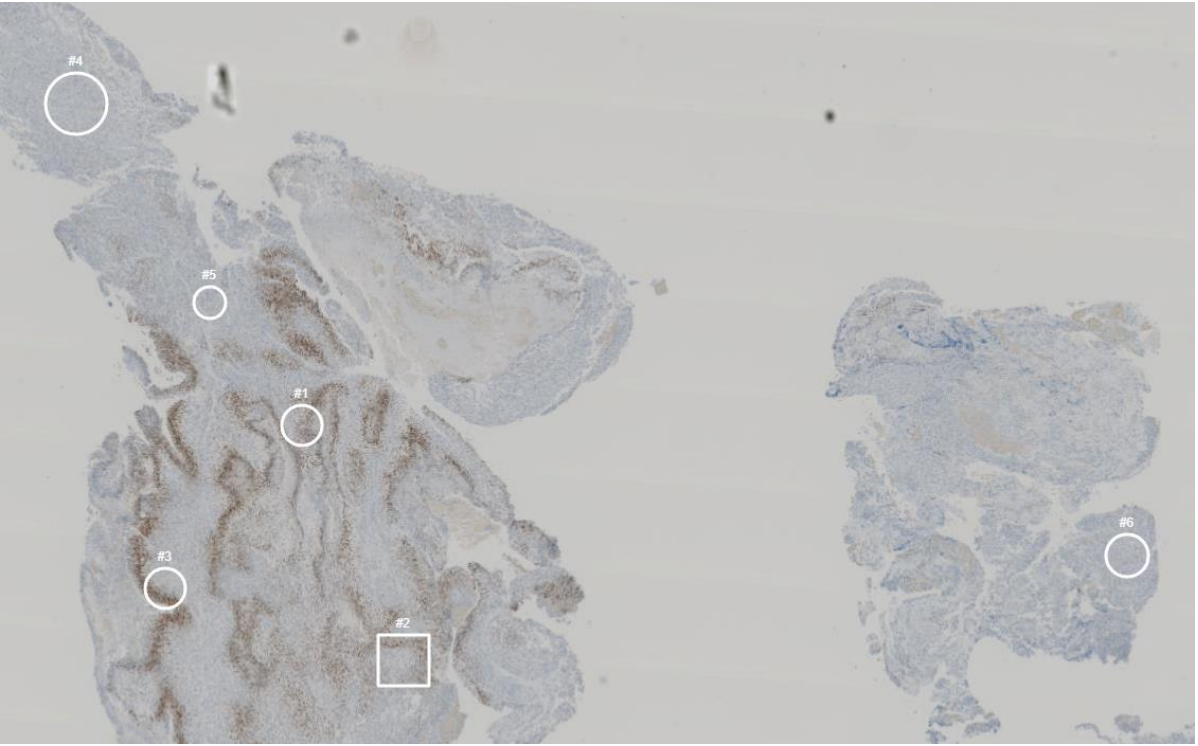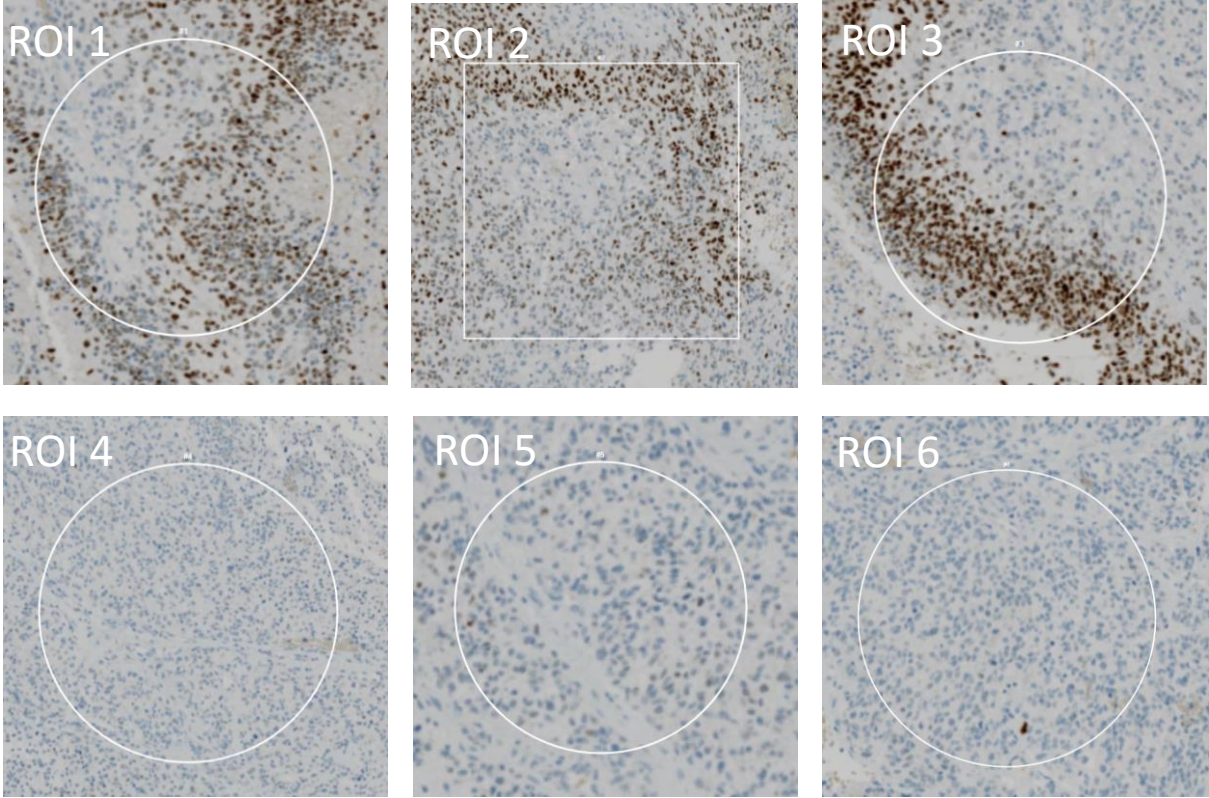

Merged HIF-1α immunohistochemical staining..

# Tumor 3

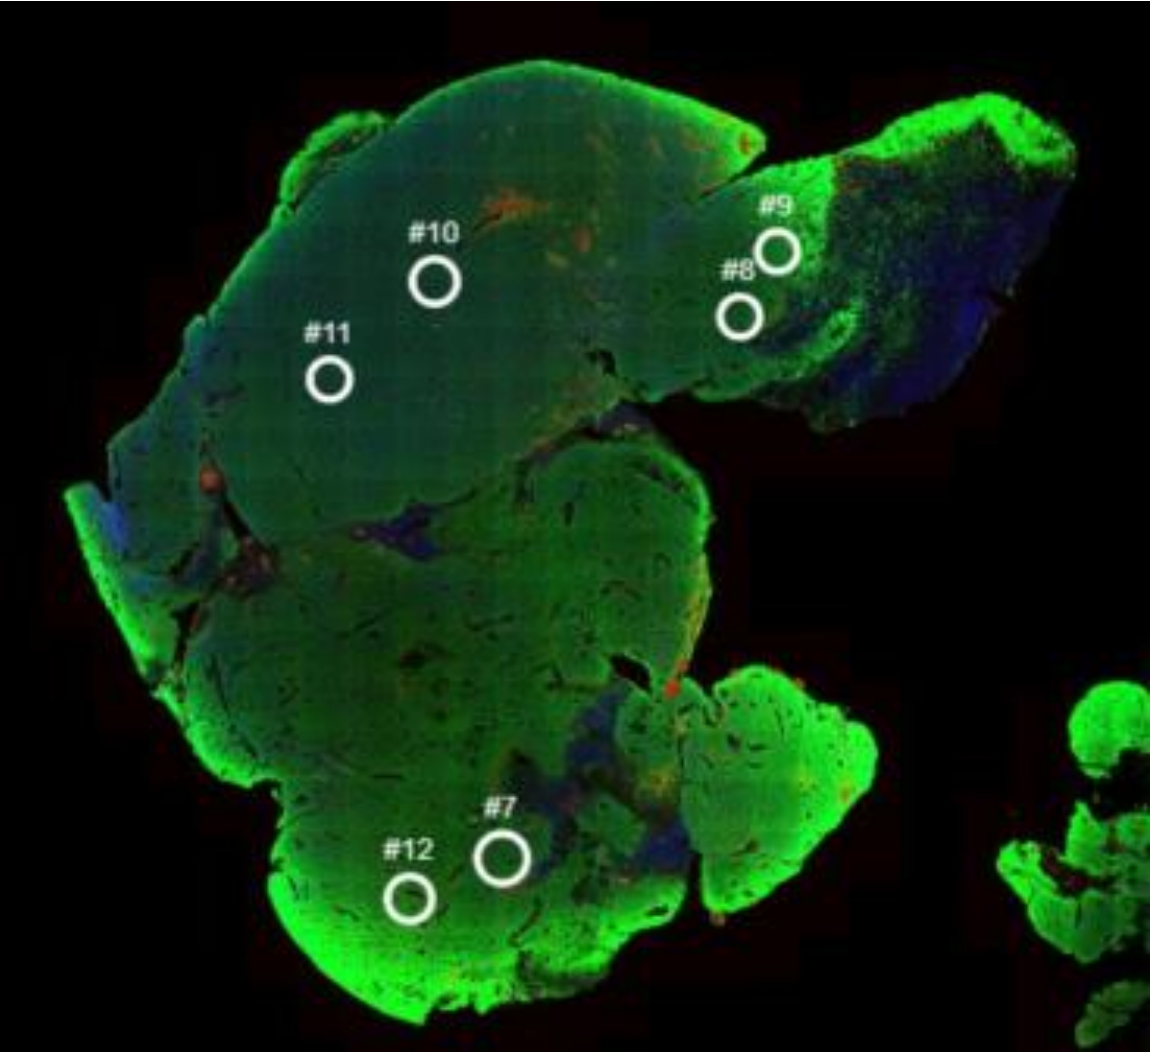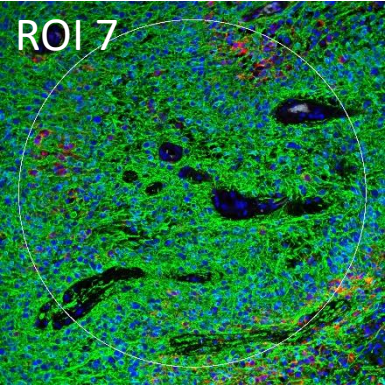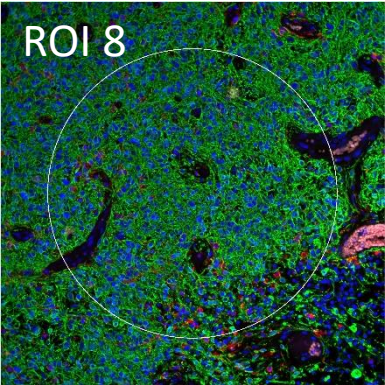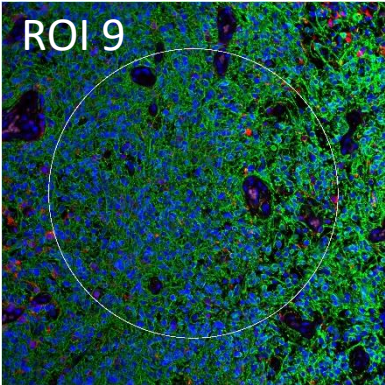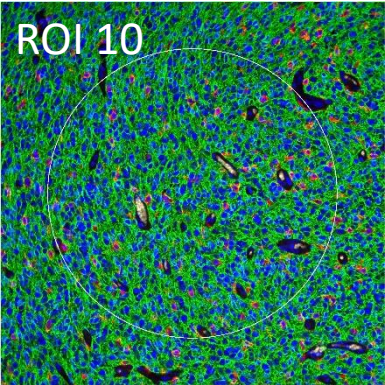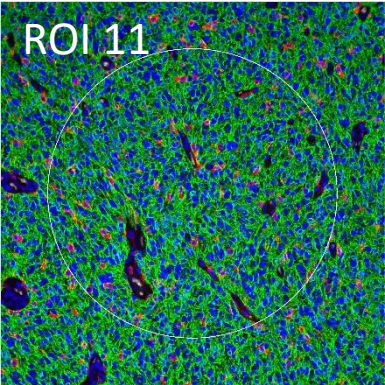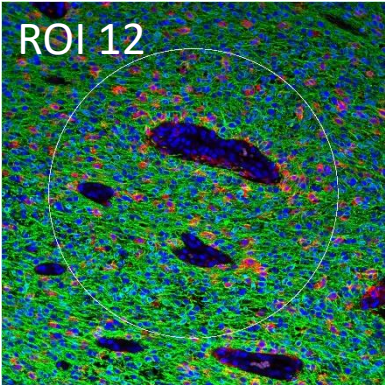

**Visualization markers:** Red: Iba1, Green: GFAP, Blue: DAPI.

# Tumor 3

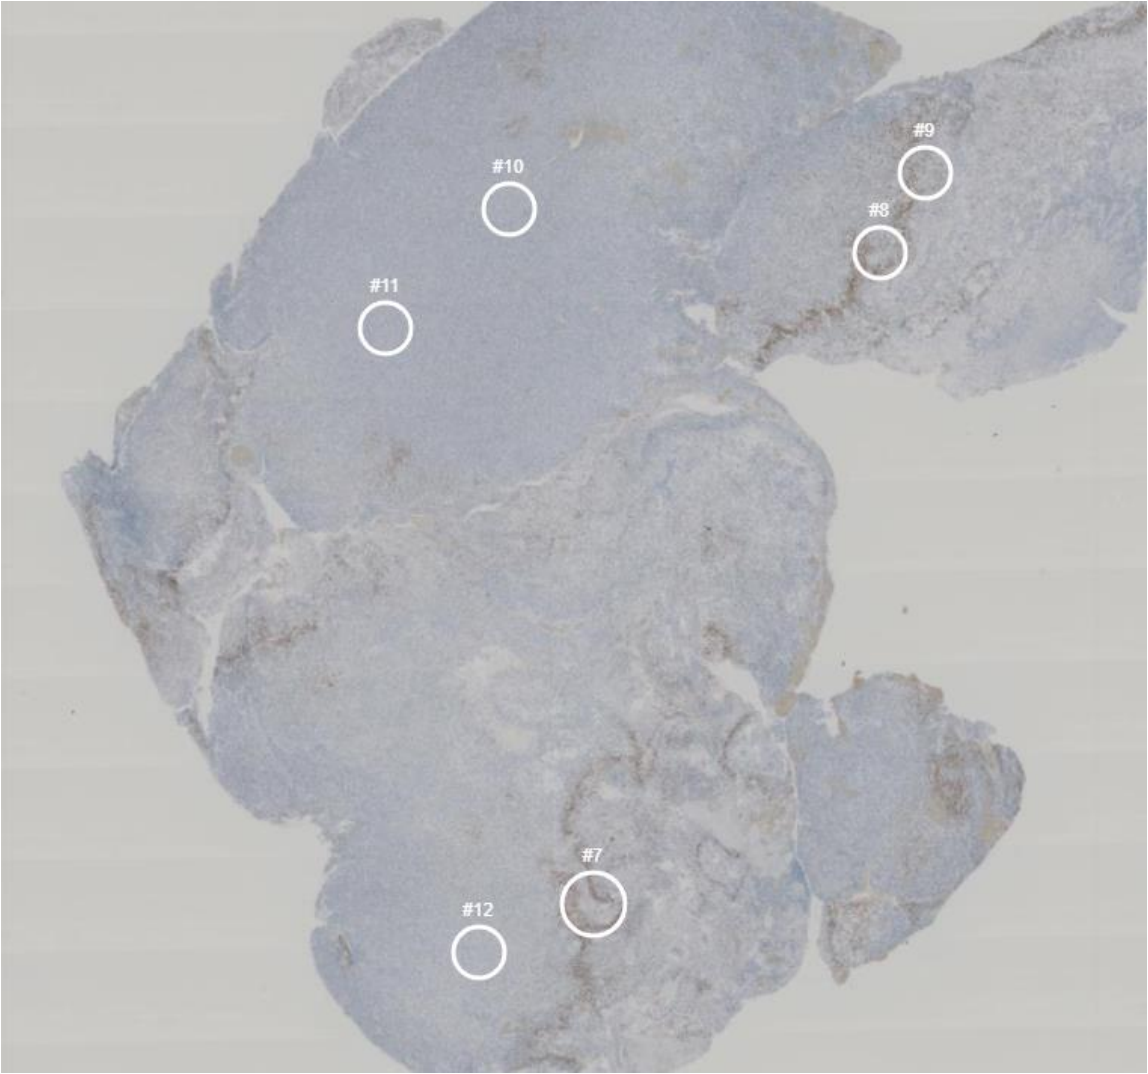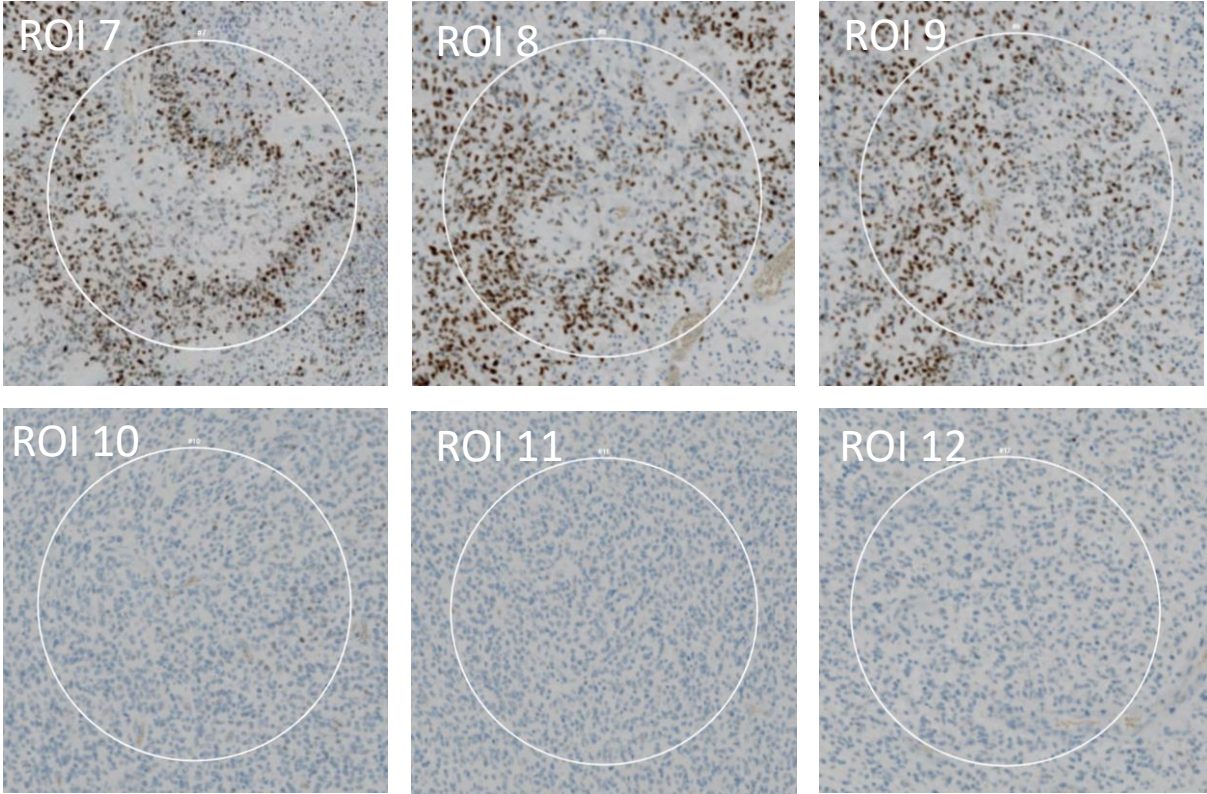

**Merged HIF-1α immunohistochemical staining.**

# Tumor 4

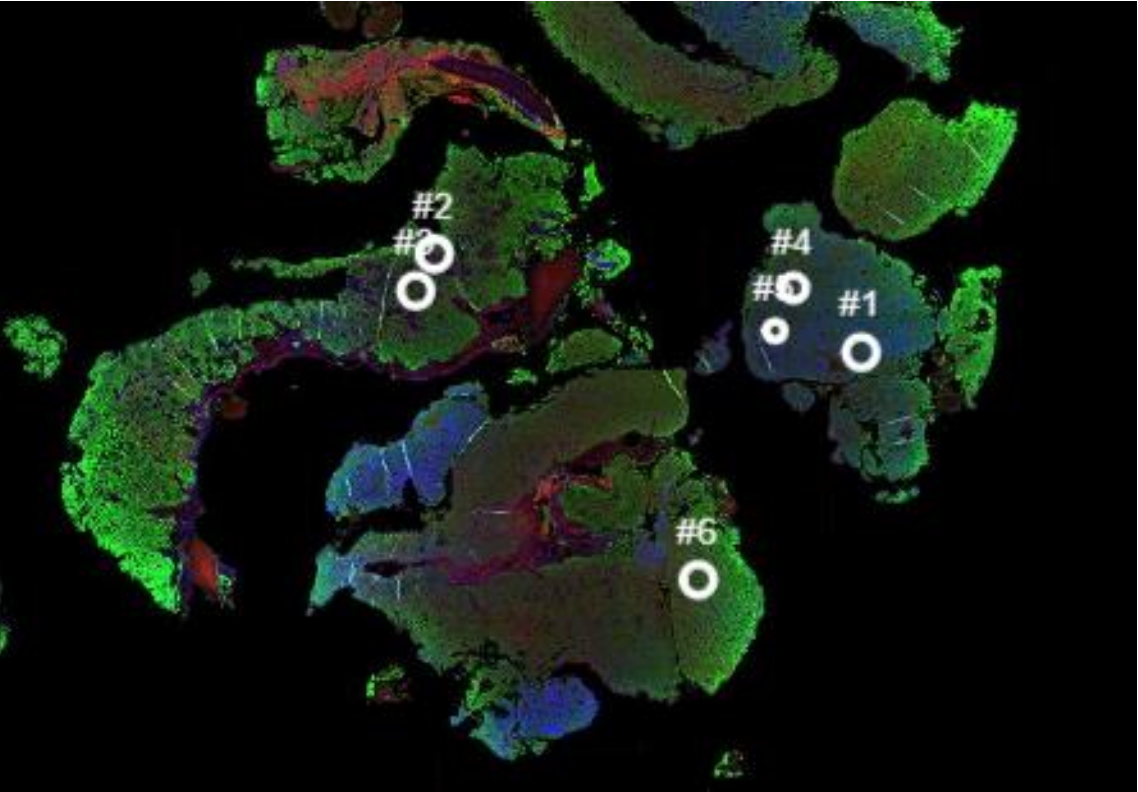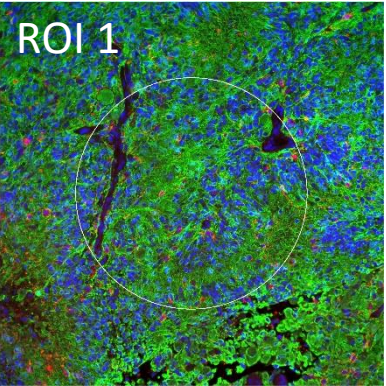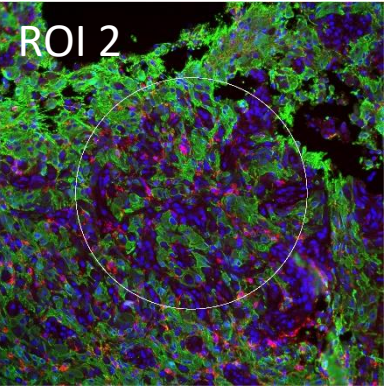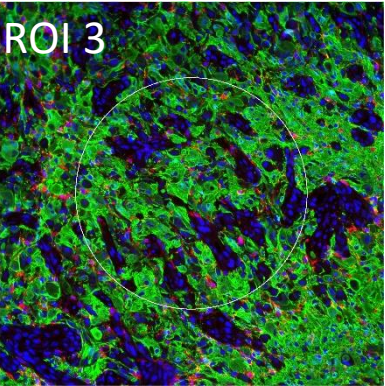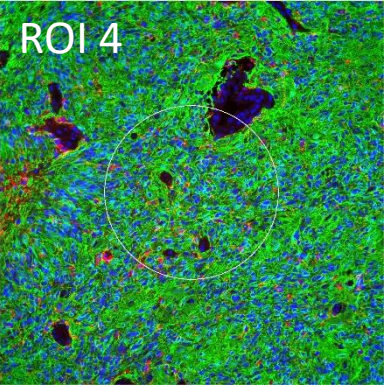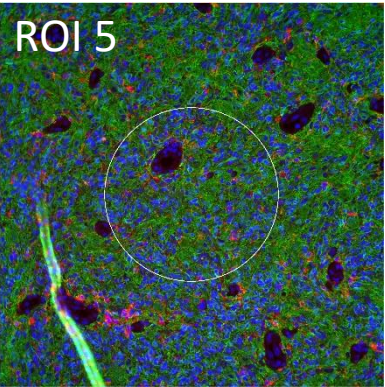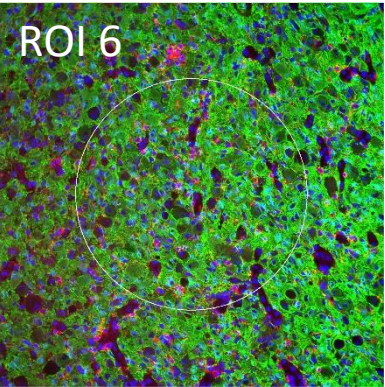

**Visualization markers:** Red: Iba1, Green: GFAP, Blue: DAPI.

# Tumor 4

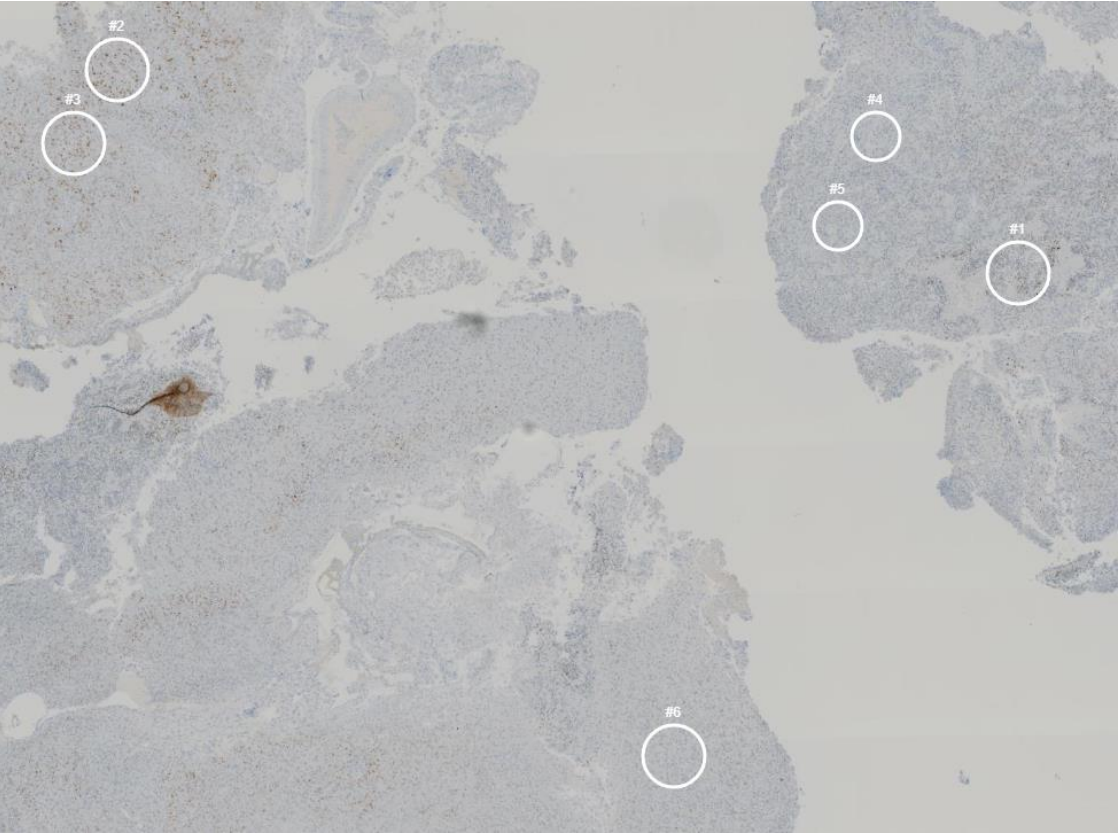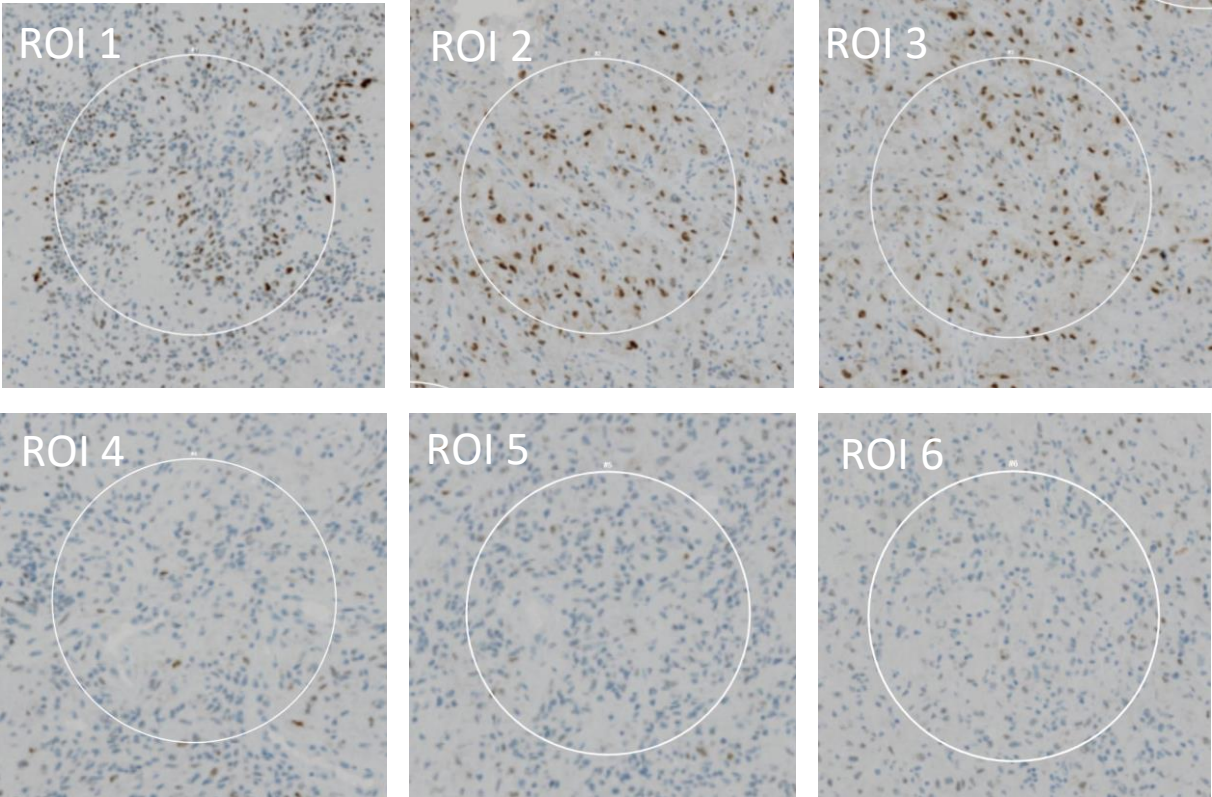

**Merged HIF-1α immunohistochemical staining.**

# Tumor 4

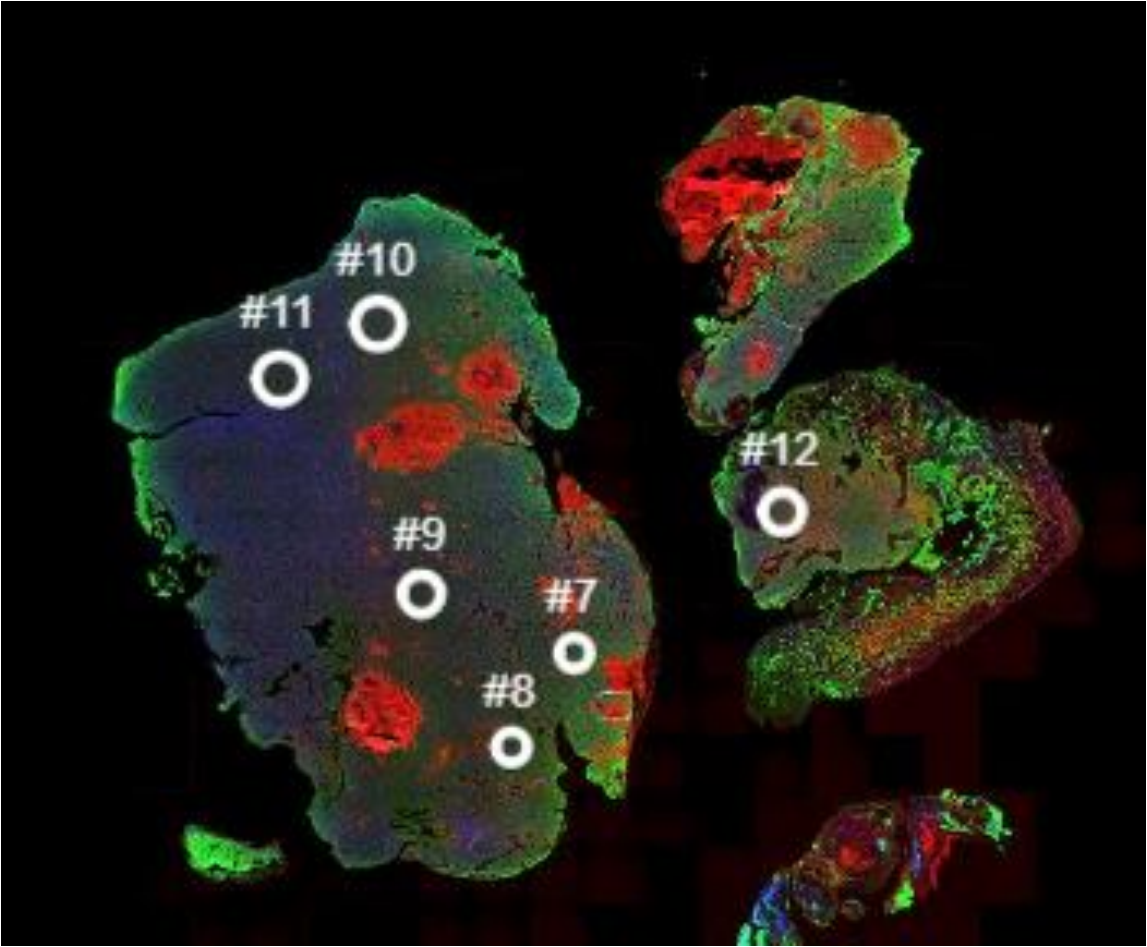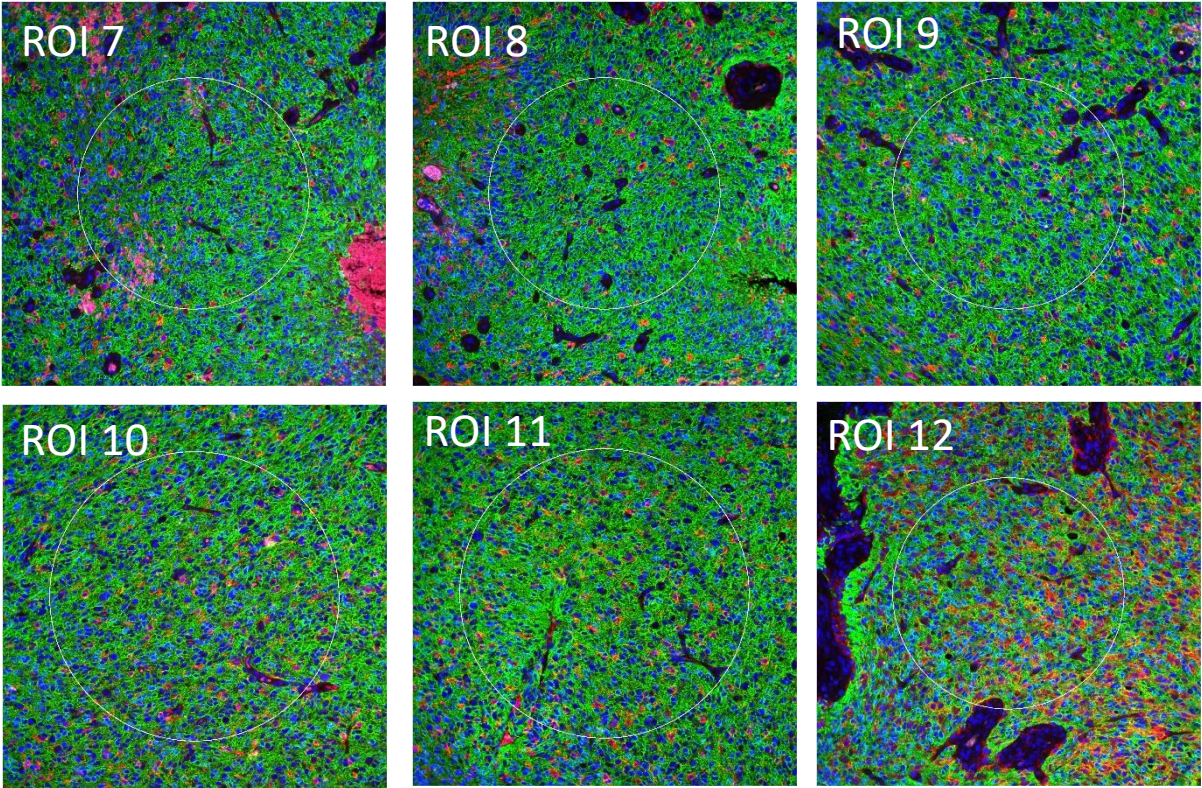

**Visualization markers:** Red: Iba1, Green: GFAP, Blue: DAPI.

# Tumor 4

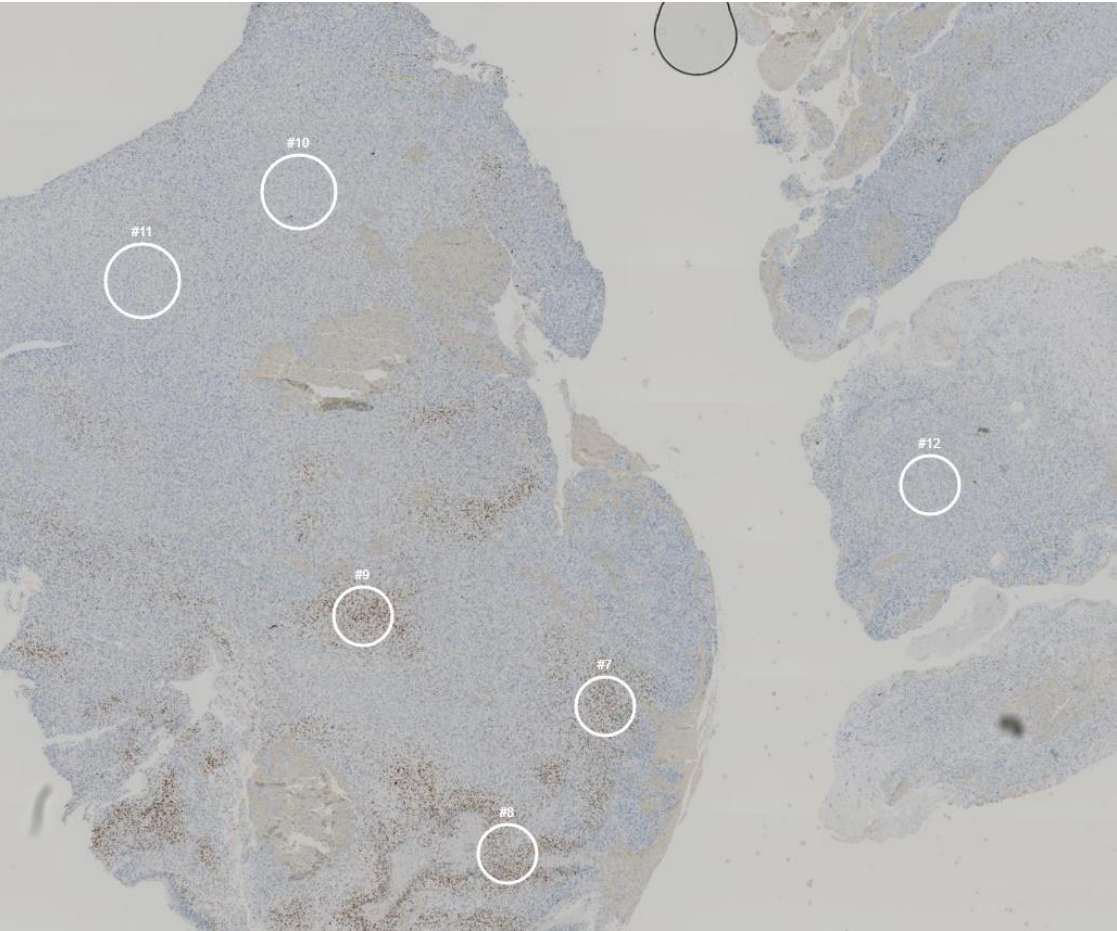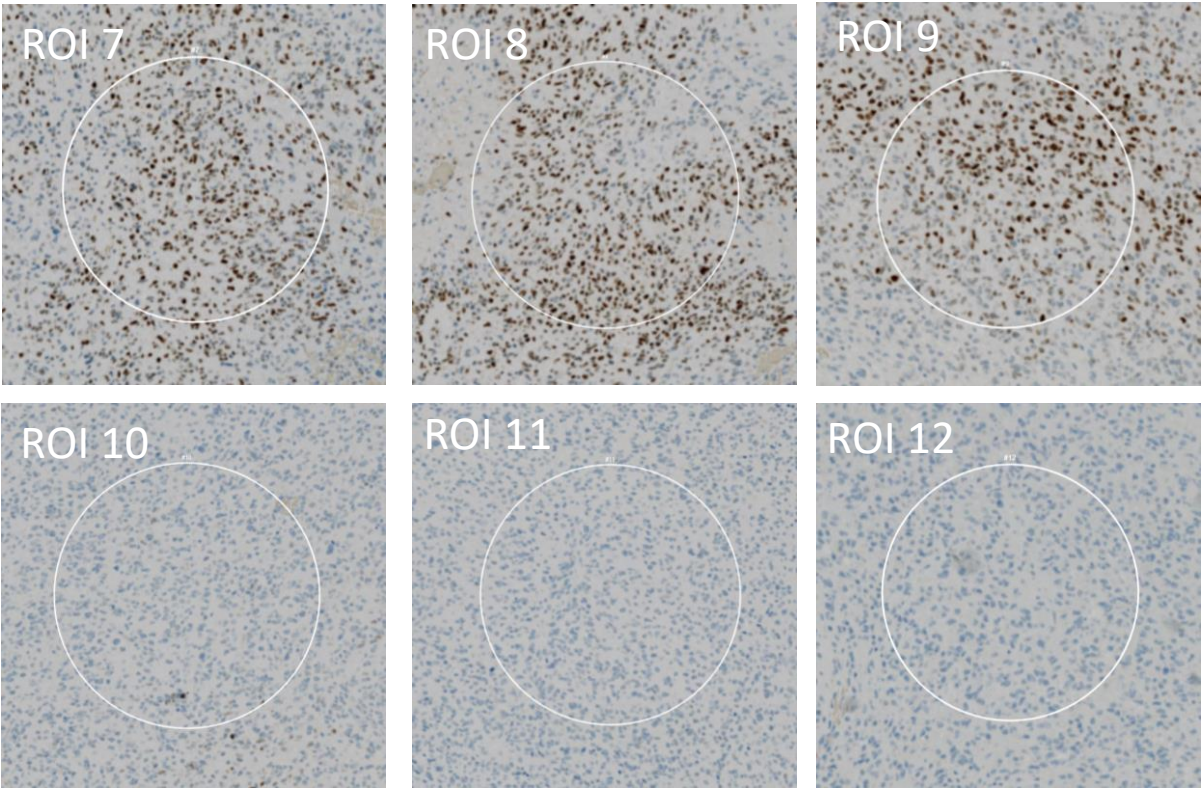

**Merged HIF-1α immunohistochemical staining.**



# Sample 5

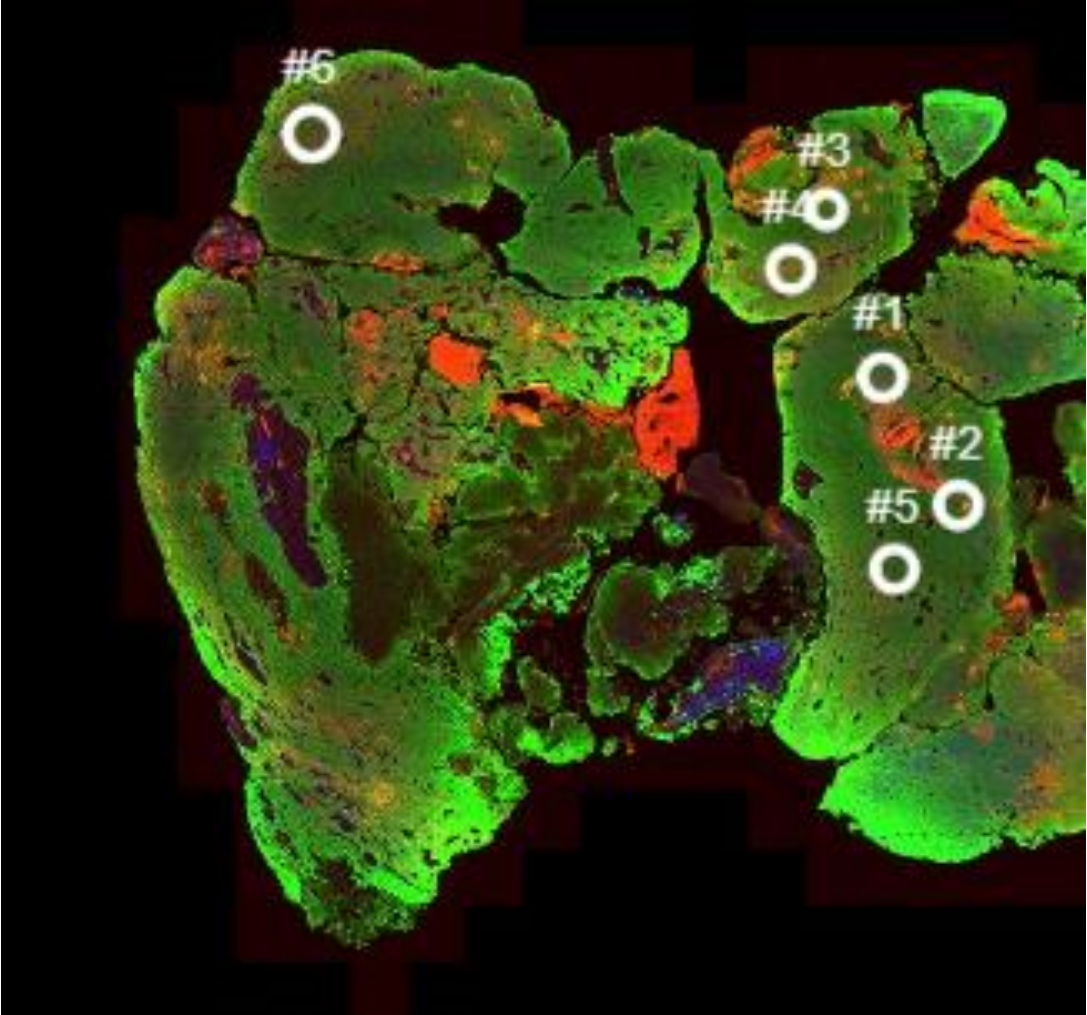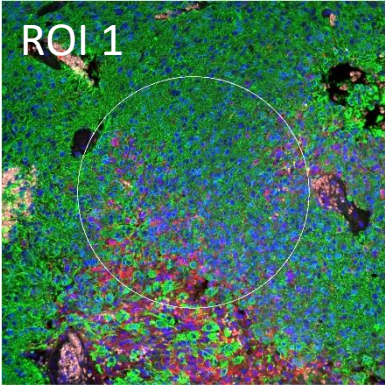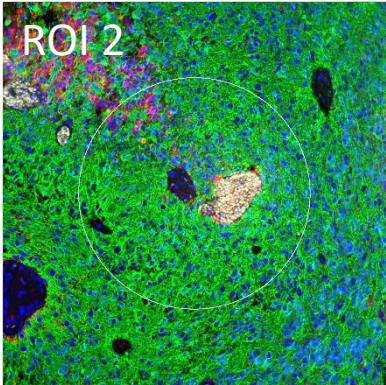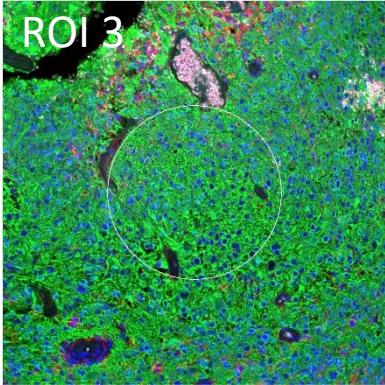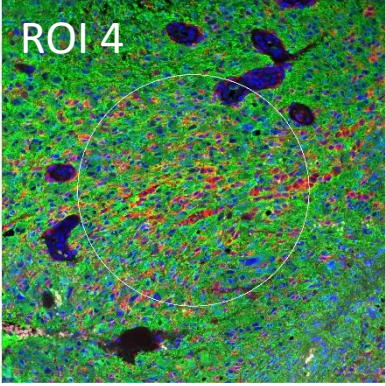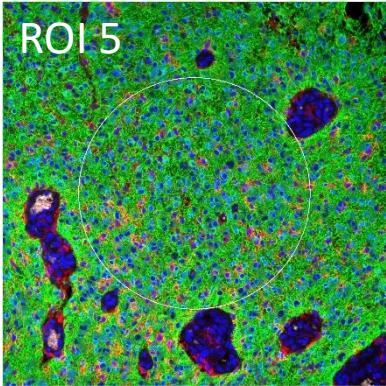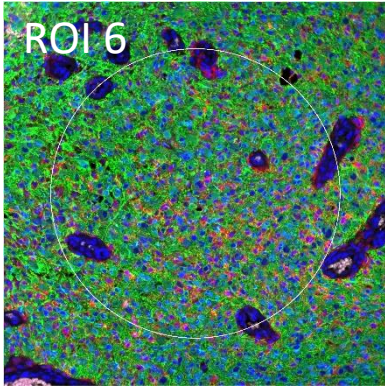

Visualization markers: Red: Iba1, Green: GFAP, Blue: DAPI.

# Tumor 5

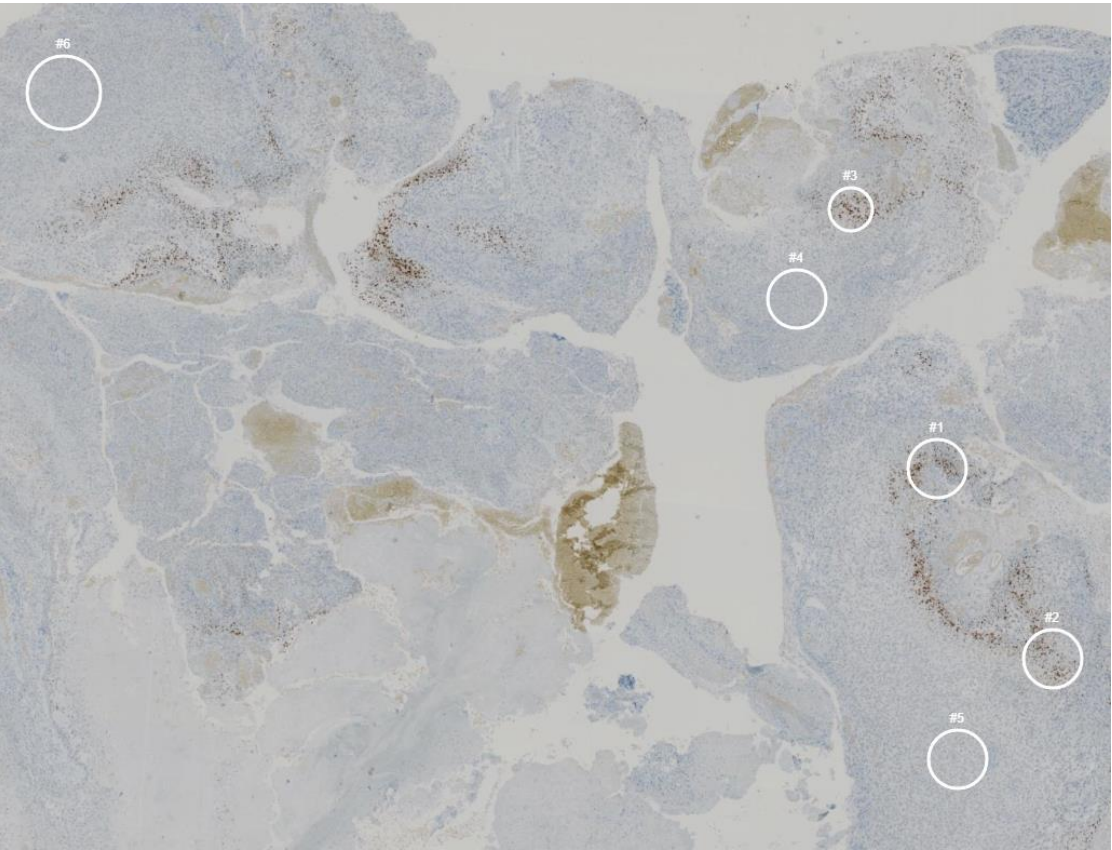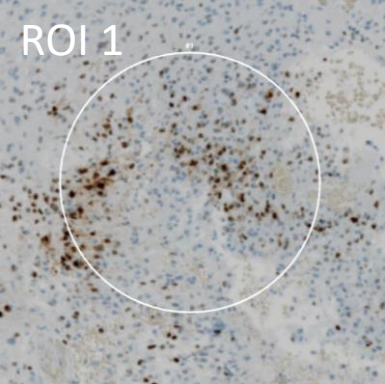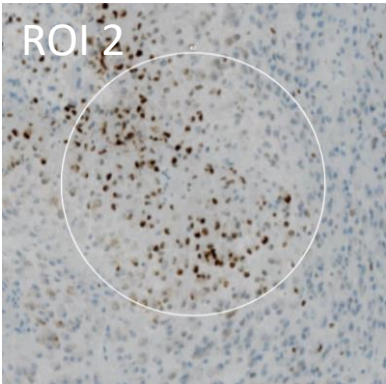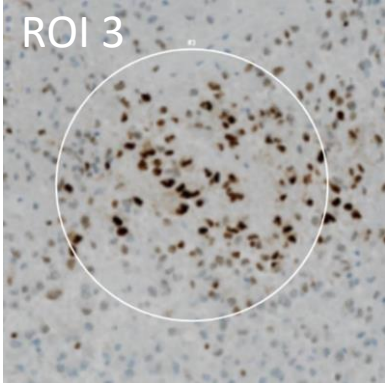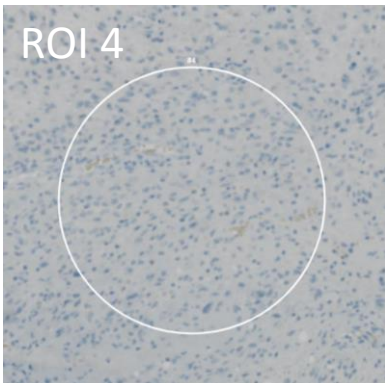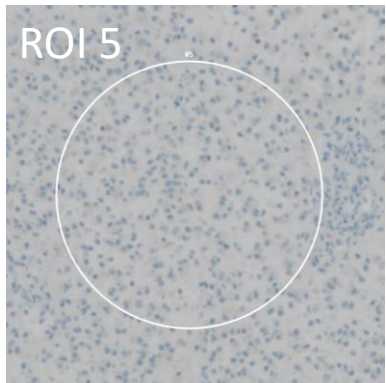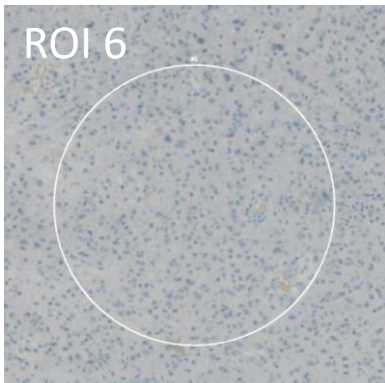

**Merged HIF-1α immunohistochemical staining.**

# Tumor 5

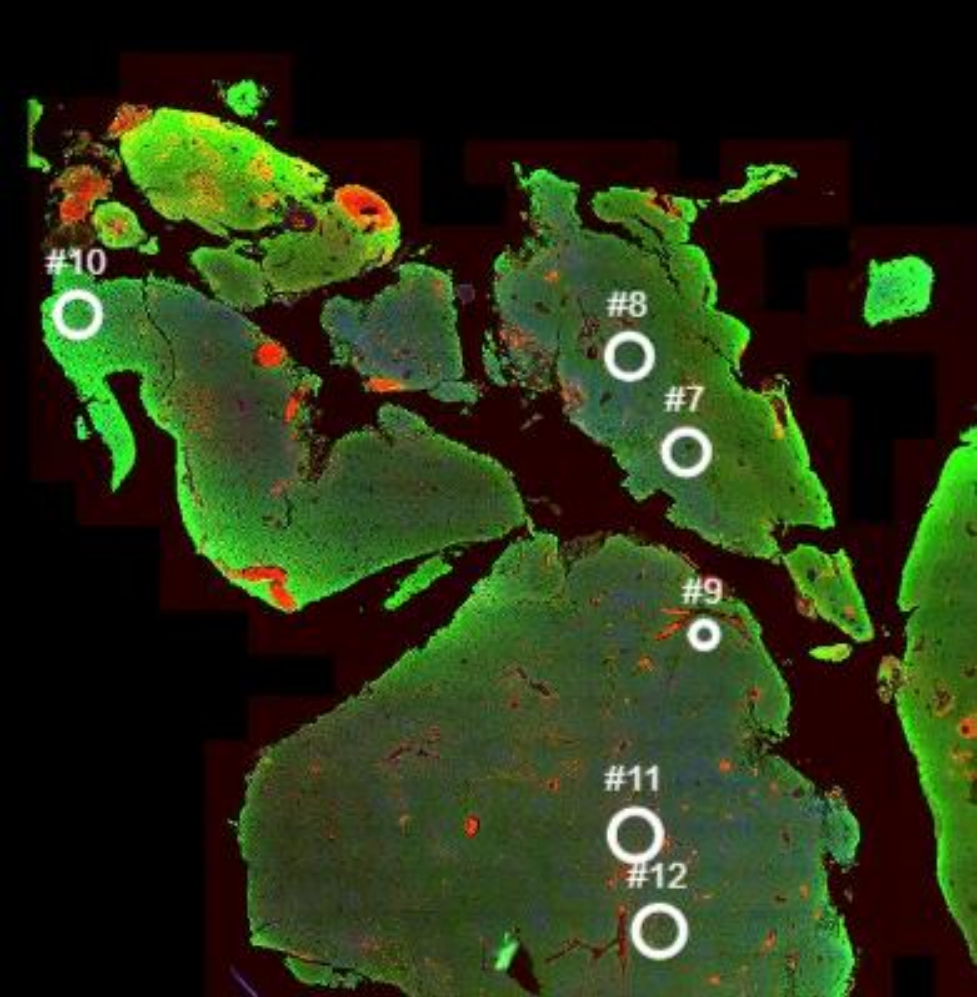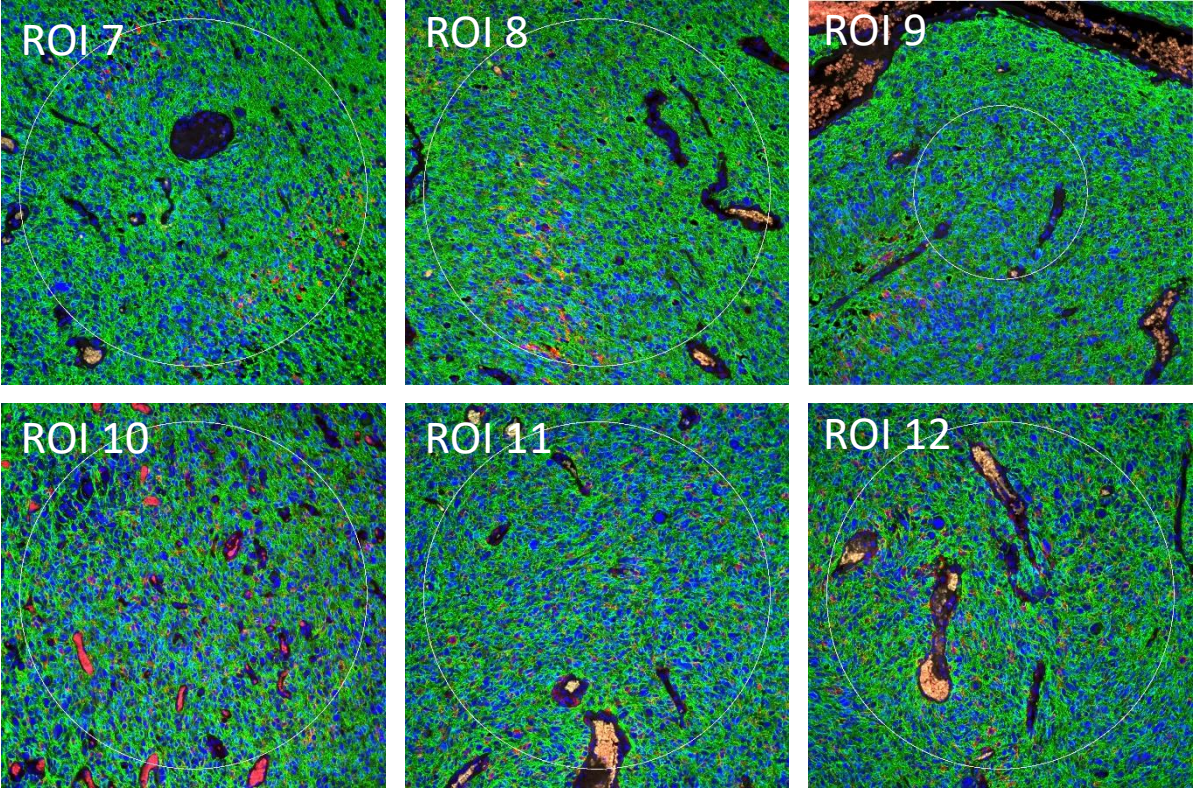

**Visualization markers:** Red: Iba1, Green: GFAP, Blue: DAPI.

# Tumor 5

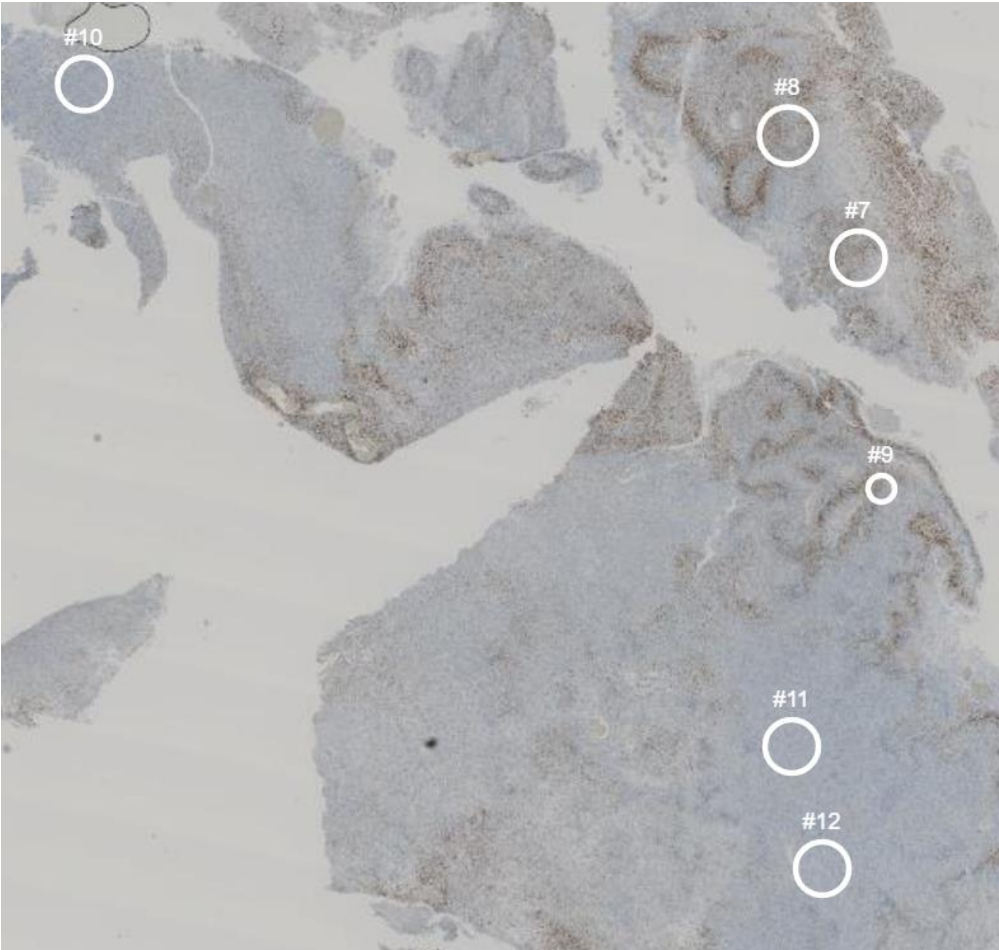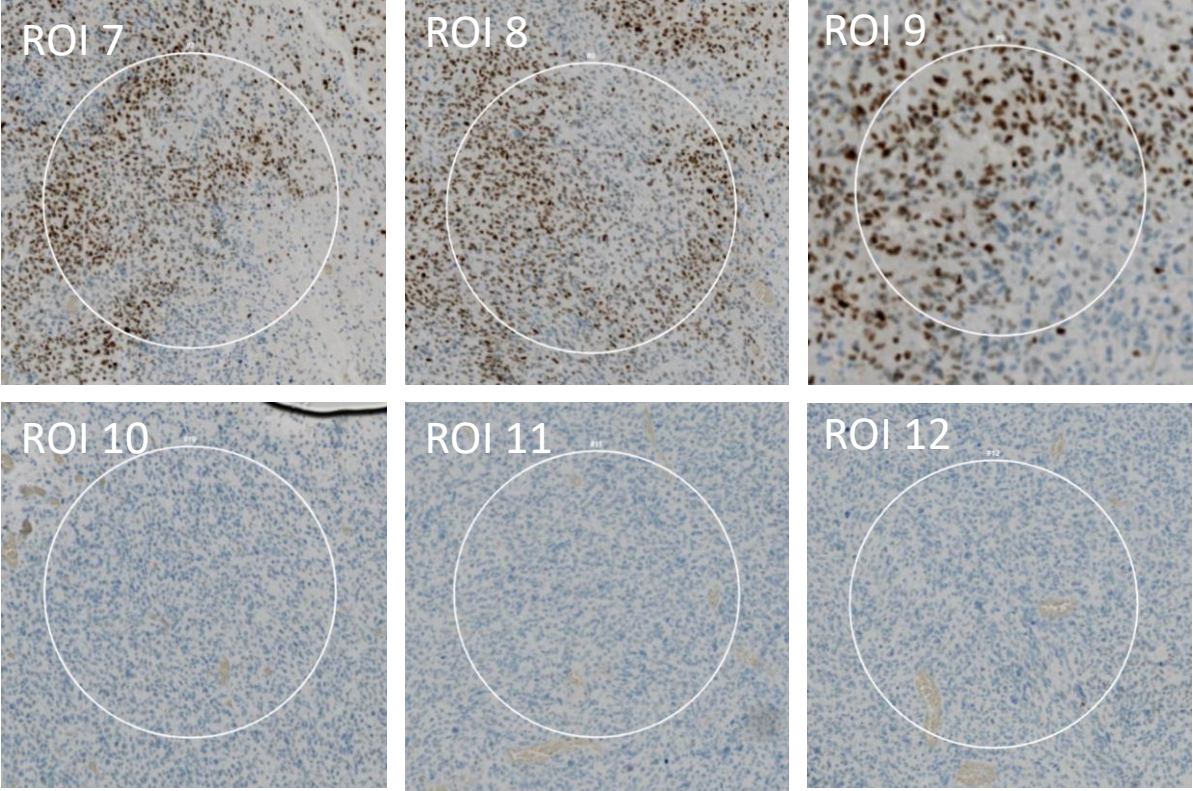

**Merged HIF-1α immunohistochemical staining.**
