# Supplementary figures and images for: Differential expression of checkpoint markers in the normoxic and hypoxic microenvironment of glioblastomas
Source: PubMed Central journal article supplement — Brain Pathol. 2022 Sep 12;33(1):e13111. doi: 10.1111/bpa.13111 (PMC9836374; doi:10.1111/bpa.13111), 2022-09-12

# Signaling pathways and survival molecules

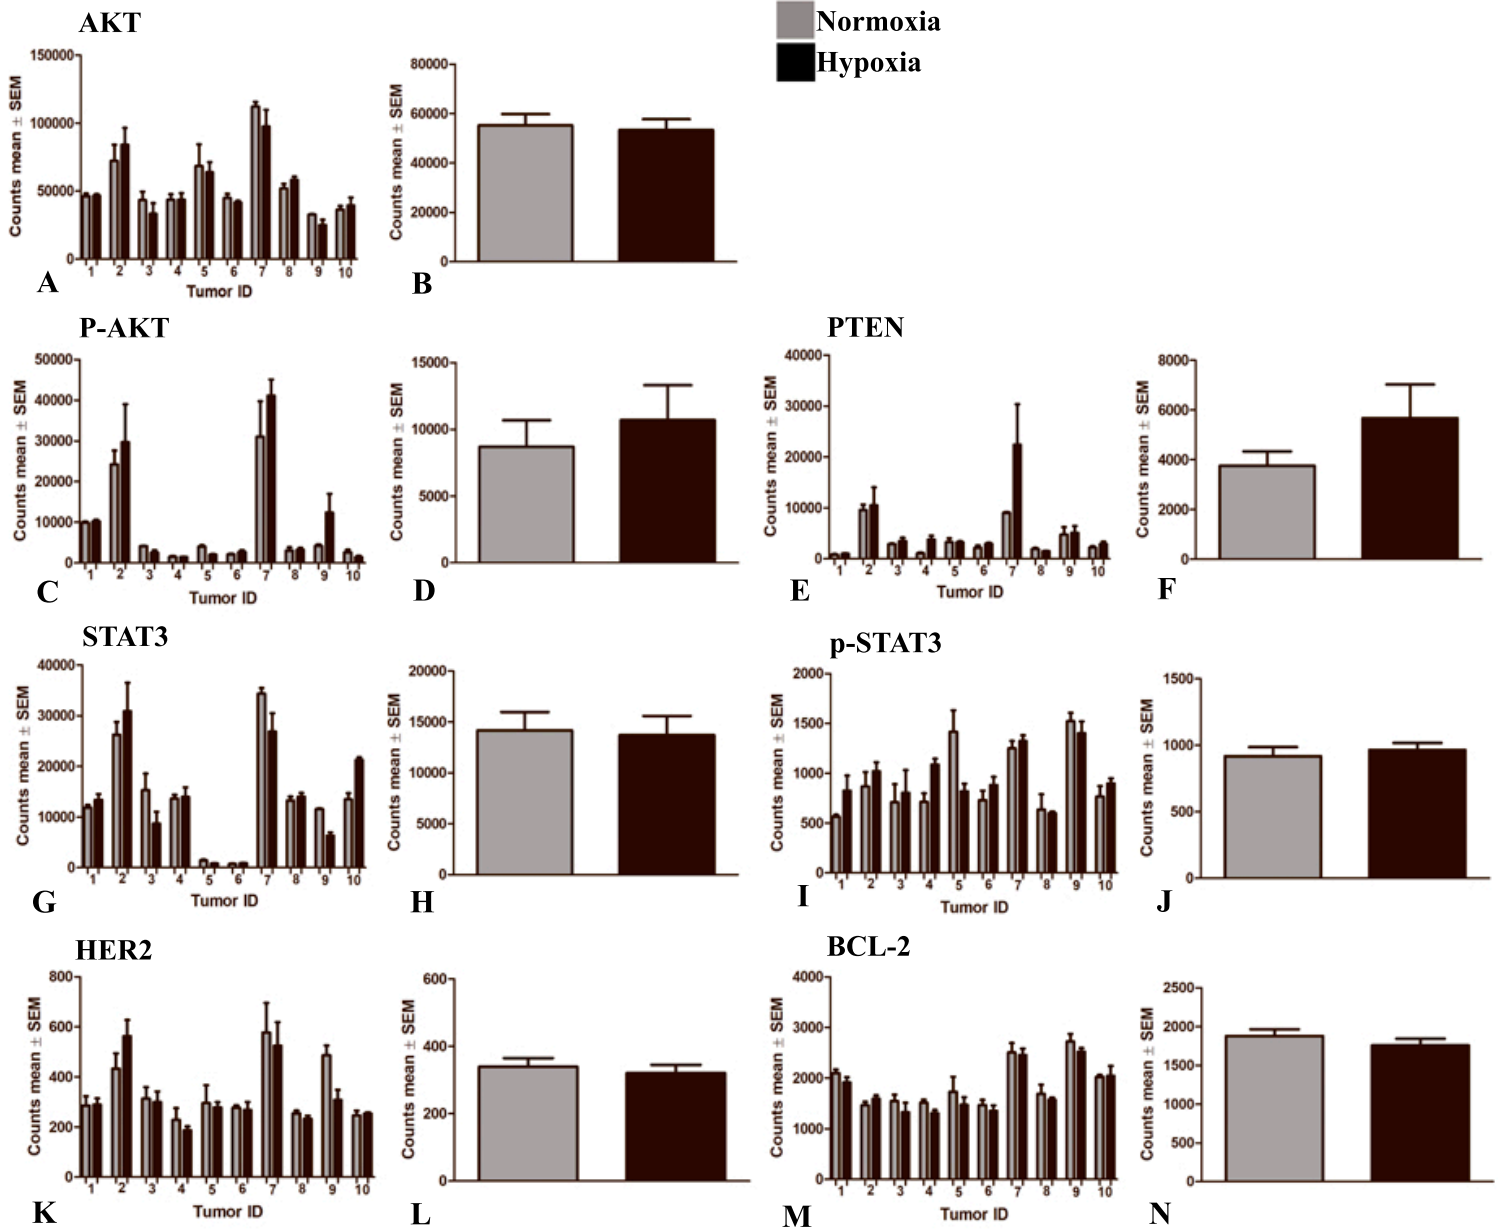

Supplement: BPA-33-e13111-s003.pdf [file BPA-33-e13111-s003.pdf]

# Pan-immune cell markers

## FOXP3

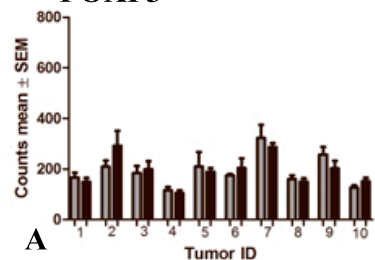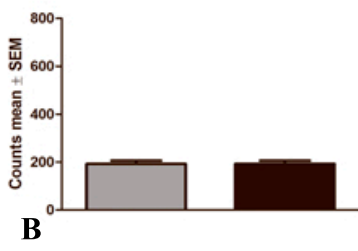

Normoxia  
Hypoxia

## CD45

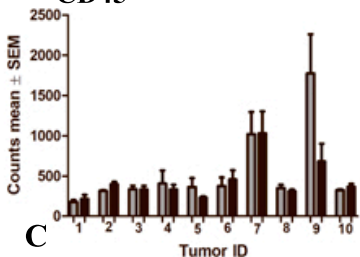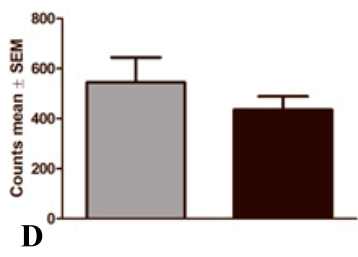

## CD45RO

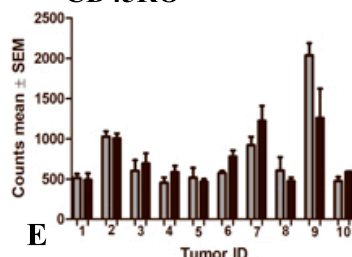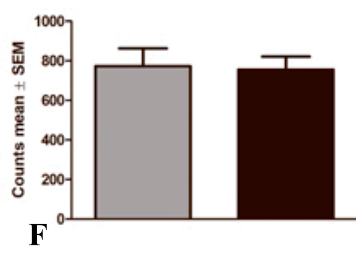

## CD3

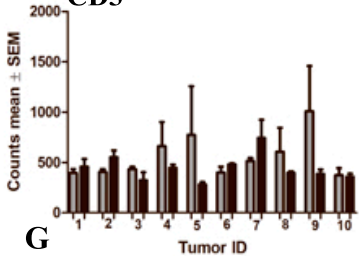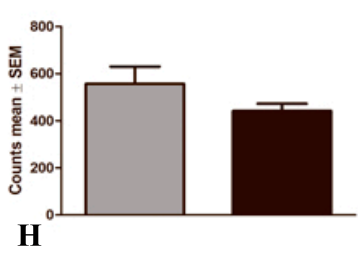

## CD4

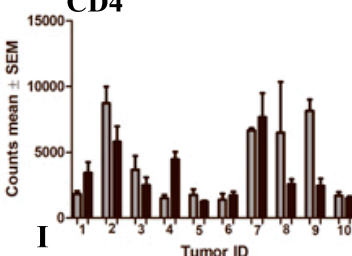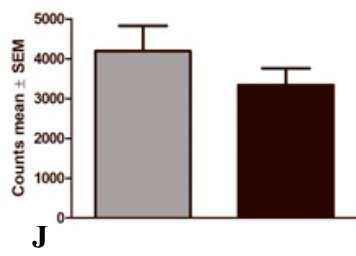

## CD8A

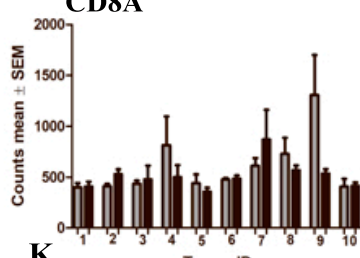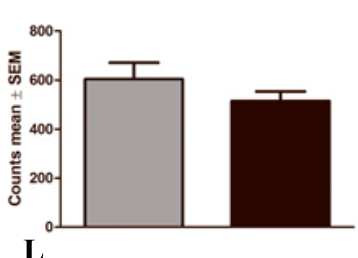

## CD14

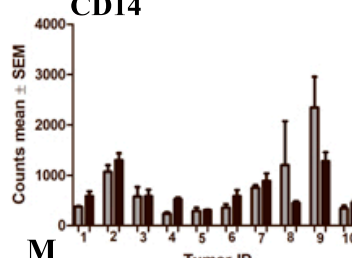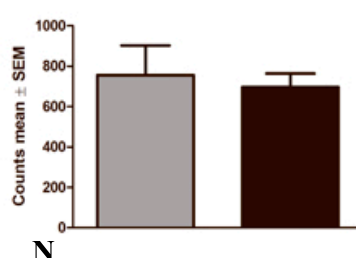

## CD66B

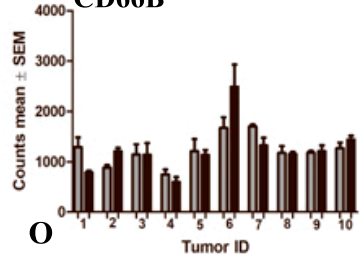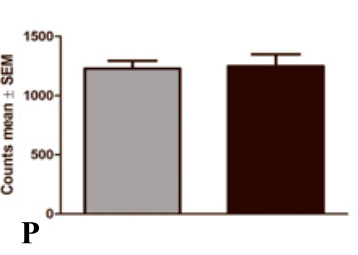

## CD163

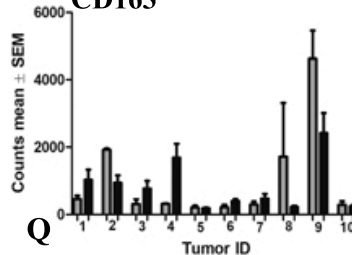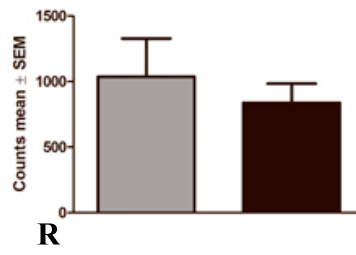

Supplement: BPA-33-e13111-s004.pdf [file BPA-33-e13111-s004.pdf]

# Immune cell checkpoint and immune activating molecules

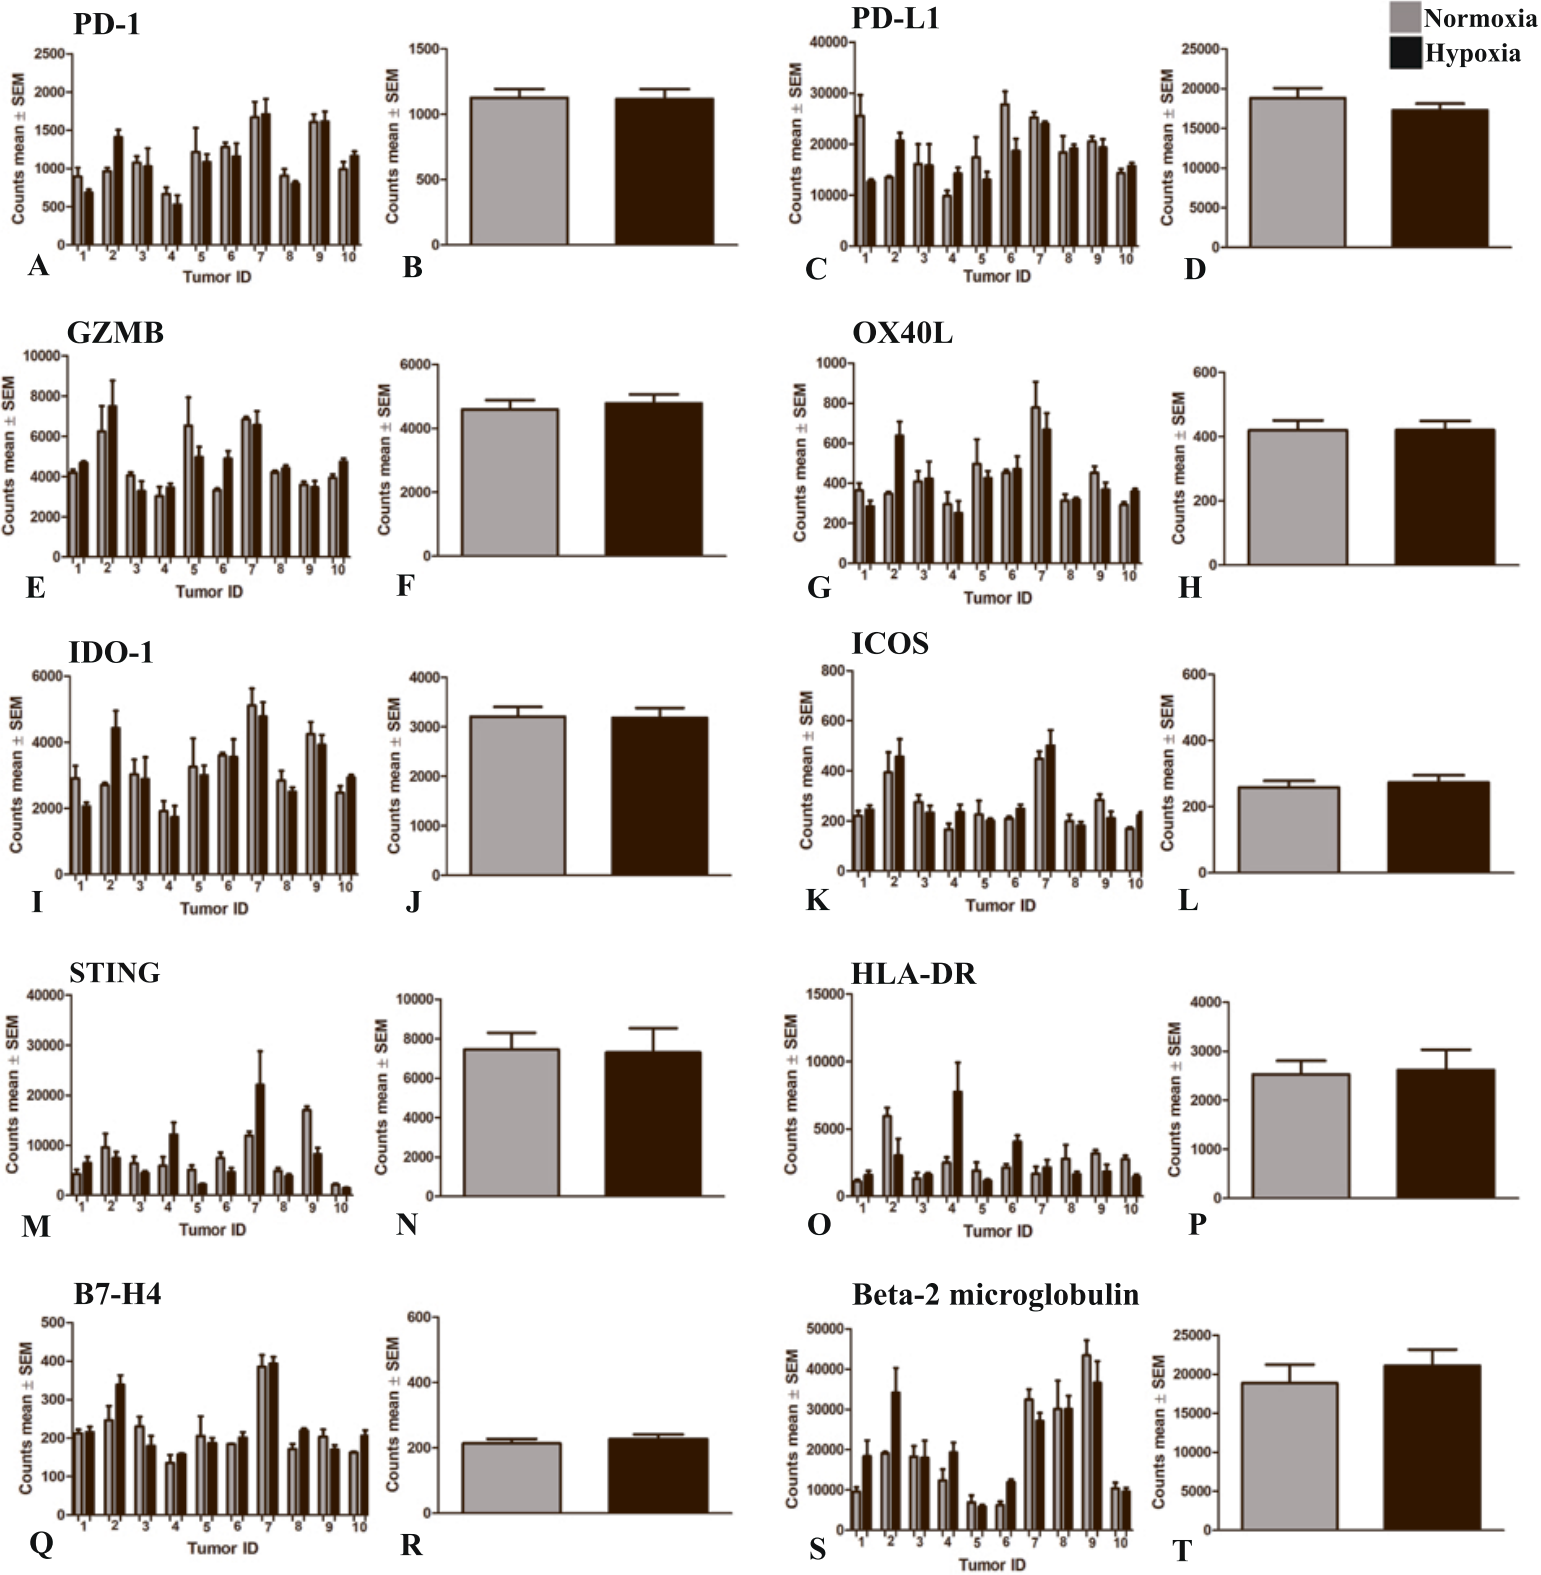

Supplement: BPA-33-e13111-s005.pdf [file BPA-33-e13111-s005.pdf]

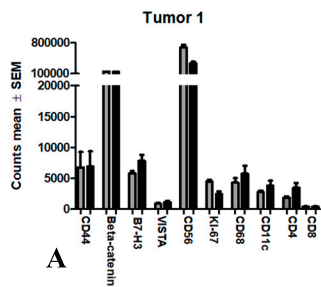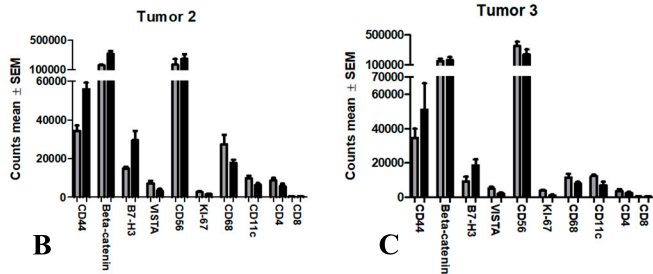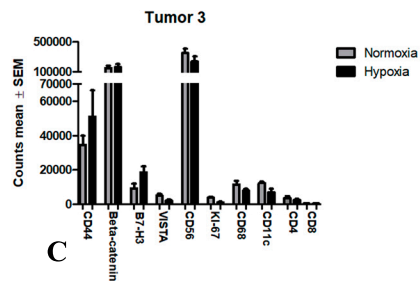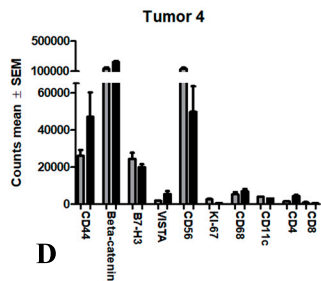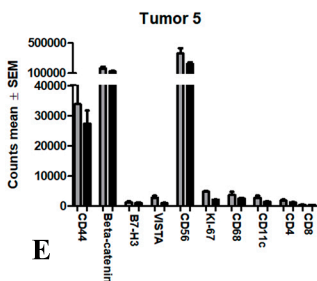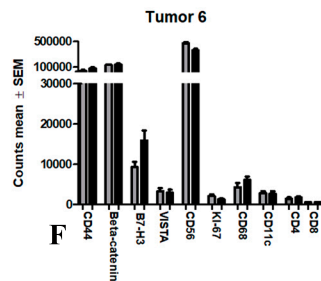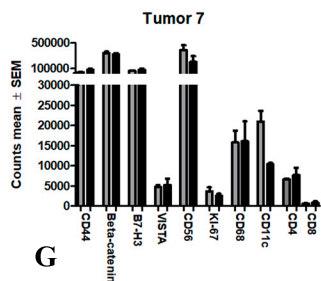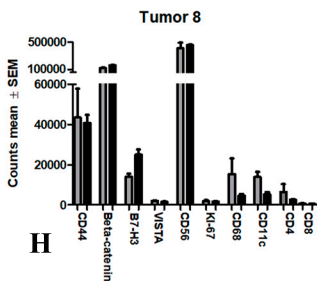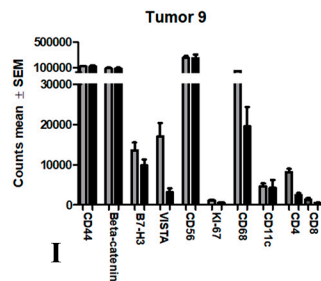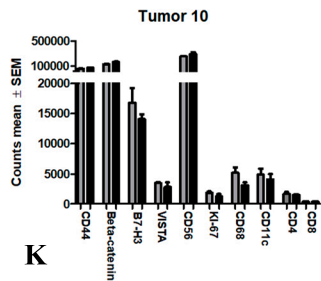

Normoxia  
Hypoxia

Supplement: BPA-33-e13111-s006.pdf [file BPA-33-e13111-s006.pdf]
